# Supplementary material for: Status, Trend, and Prospect of Global Farmland Abandonment Research: A Bibliometric Analysis
Source: MDPI journal article supplement (doi:10.3390/ijerph192316007), 2022-11-30
Supplement: s1 [file s1]

### Supplementary Table S1 Database Article

| Sequence | Paper                                           | DOI                                             |
|----------|-------------------------------------------------|-------------------------------------------------|
| 1        | CRAMER VA, 2008, TRENDS ECOL EVOL               | 10.1016/j.tree.2007.10.005                      |
| 2        | VERBURG PH, 2009, LANDSCAPE ECOL                | 10.1007/s10980-009-9355-7                       |
| 3        | GEHRIG-FASEL J, 2007, J VEG SCI                 | 10.1658/1100-9233(2007)18[571:TLSITS]2.0.CO;2   |
| 4        | CAMPBELL JE, 2008, ENVIRON SCI TECHNOL          | 10.1021/es800052w                               |
| 5        | SILVER WL, 2000, RESTOR ECOL                    | 10.1046/j.1526-100x.2000.80054.x                |
| 6        | GELLRICH M, 2007, AGR ECOSYST ENVIRON           | 10.1016/j.agee.2006.05.001                      |
| 7        | GARCIA-RUIZ JM, 2011, AGR ECOSYST ENVIRON       | 10.1016/j.agee.2011.01.003                      |
| 8        | BAUMANN M, 2011, LAND USE POLICY                | 10.1016/j.landusepol.2010.11.003                |
| 9        | QUEIROZ C, 2014, FRONT ECOL ENVIRON             | 10.1890/120348                                  |
| 10       | RENWICK A, 2013, LAND USE POLICY                | 10.1016/j.landusepol.2012.04.005                |
| 11       | ESTEL S, 2015, REMOTE SENS ENVIRON              | 10.1016/j.rse.2015.03.028                       |
| 12       | PRISHCHEPOV AV, 2013, LAND USE POLICY           | 10.1016/j.landusepol.2012.06.011                |
| 13       | POYATOS R, 2003, MT RES DEV                     | 10.1659/0276-4741(2003)023[0362:LUALCC]2.0.CO;2 |
| 14       | ZHANG C, 2016, SOIL BIOL BIOCHEM                | 10.1016/j.soilbio.2016.02.013                   |
| 15       | KOULOURI M, 2007, CATENA                        | 10.1016/j.catena.2006.07.001                    |
| 16       | LASANTA T, 2017, CATENA                         | 10.1016/j.catena.2016.02.024                    |
| 17       | LUGO AE, 2004, FOREST ECOL MANAG                | 10.1016/j.foreco.2003.09.012                    |
| 18       | KUEMMERLE T, 2008, ECOSYSTEMS                   | 10.1007/s10021-008-9146-z                       |
| 19       | BOWEN ME, 2007, BIOL CONSERV                    | 10.1016/j.biocon.2007.08.012                    |
| 20       | ROMERO-CALCERRADA R, 2004, LANDSCAPE URBAN PLAN | 10.1016/S0169-2046(03)00112-9                   |
| 21       | GELLRICH M, 2007, LANDSCAPE URBAN PLAN          | 10.1016/j.landurbplan.2006.03.004               |
| 22       | VAN DER WAL A, 2006, SOIL BIOL BIOCHEM          | 10.1016/j.soilbio.2005.04.017                   |
| 23       | SUAREZ-SEOANE S, 2002, BIOL CONSERV             | 10.1016/S0006-3207(01)00213-0                   |
| 24       | MULLER D, 2013, AGR SYST                        | 10.1016/j.agsy.2012.12.010                      |
| 25       | HOOPER E, 2005, J APPL ECOL                     | 10.1111/j.1365-2664.2005.01106.x                |
| 26       | ALCANTARA C, 2013, ENVIRON RES LETT             | 10.1088/1748-9326/8/3/035035                    |
| 27       | LASANTA T, 2000, CATENA                         | 10.1016/S0341-8162(99)00079-X                   |
| 28       | DUNJO G, 2003, CATENA                           | 10.1016/S0341-8162(02)00148-0                   |
| 29       | CAMMERAAT LH, 1999, CATENA                      | 10.1016/S0341-8162(98)00072-1                   |
| 30       | BEILIN R, 2014, LAND USE POLICY                 | 10.1016/j.landusepol.2013.07.003                |
| 31       | PRISHCHEPOV AV, 2012, ENVIRON RES LETT          | 10.1088/1748-9326/7/2/024021                    |
| 32       | CHAUCHARD S, 2007, ECOSYSTEMS                   | 10.1007/s10021-007-9065-4                       |
| 33       | GOUGH MW, 1990, BIOL CONSERV                    | 10.1016/0006-3207(90)90104-W                    |
| 34       | HUNZIKER M, 1995, LANDSCAPE URBAN PLAN          | 10.1016/0169-2046(95)93251-J                    |
| 35       | HEDLUND K, 2003, OIKOS                          | 10.1034/j.1600-0706.2003.12511.x                |
| 36       | TERRES JM, 2015, LAND USE POLICY                | 10.1016/j.landusepol.2015.06.009                |
| 37       | ZHANG Y, 2014, LAND USE POLICY                  | 10.1016/j.landusepol.2014.05.011                |
| 38       | SLUITER R, 2007, LANDSCAPE ECOL                 | 10.1007/s10980-006-9049-3                       |

| Sequence | Paper                                     | DOI                                             |
|----------|-------------------------------------------|-------------------------------------------------|
| 39       | HOOPER E, 2002, ECOL APPL                 | 10.1890/1051-0761(2002)012[1626:RONTST]2.0.CO;2 |
| 40       | LI SF, 2017, J GEOGR SCI                  | 10.1007/s11442-017-1426-0                       |
| 41       | LESSCHEN JP, 2008, EARTH SURF PROC LAND   | 10.1002/esp.1676                                |
| 42       | WANG B, 2011, ENVIRON EARTH SCI           | 10.1007/s12665-010-0577-4                       |
| 43       | KUEMMERLE T, 2011, GLOBAL CHANGE BIOL     | 10.1111/j.1365-2486.2010.02333.x                |
| 44       | MOLINILLO M, 1997, ENVIRON MANAGE         | 10.1007/s002679900051                           |
| 45       | LABRECQUE M, 2003, BIOMASS BIOENERG       | 10.1016/S0961-9534(02)00192-7                   |
| 46       | LIU Y, 2012, GEOMORPHOLOGY                | 10.1016/j.geomorph.2011.10.009                  |
| 47       | PLIENINGER T, 2014, PLOS ONE              | 10.1371/journal.pone.0098355                    |
| 48       | ARNAEZ J, 2011, LAND DEGRAD DEV           | 10.1002/ldr.1032                                |
| 49       | SCHIERHORN F, 2013, GLOBAL BIOGEOCHEM CY  | 10.1002/2013GB004654                            |
| 50       | XU DD, 2019, J ENVIRON MANAGE             | 10.1016/j.jenvman.2018.11.136                   |
| 51       | SIRAMI C, 2008, BIOL CONSERV              | 10.1016/j.biocon.2007.10.015                    |
| 52       | CERDA A, 1997, ARID SOIL RES REHAB        | 10.1080/15324989709381469                       |
| 53       | DIAZ GI, 2011, LANDSCAPE URBAN PLAN       | 10.1016/j.landurbplan.2010.11.005               |
| 54       | LASANTA T, 2015, ENVIRON SCI POLICY       | 10.1016/j.envsci.2015.05.012                    |
| 55       | MUNROE DK, 2013, CURR OPIN ENV SUST       | 10.1016/j.cosust.2013.06.010                    |
| 56       | UCHIDA K, 2014, ECOL MONOGR               | 10.1890/13-2170.1                               |
| 57       | HOOGWIJK M, 2009, BIOMASS BIOENERG        | 10.1016/j.biombioe.2008.04.005                  |
| 58       | LESSCHEN JP, 2007, CATENA                 | 10.1016/j.catena.2006.05.014                    |
| 59       | CHAPMAN CA, 1999, CONSERV BIOL            | 10.1046/j.1523-1739.1999.98229.x                |
| 60       | YAN JZ, 2016, LAND USE POLICY             | 10.1016/j.landusepol.2016.06.014                |
| 61       | HATNA E, 2011, ECOSYSTEMS                 | 10.1007/s10021-011-9441-y                       |
| 62       | HOLTKAMP R, 2008, APPL SOIL ECOL          | 10.1016/j.apsoil.2007.11.002                    |
| 63       | ZELLER V, 2001, SOIL BIOL BIOCHEM         | 10.1016/S0038-0717(00)00208-X                   |
| 64       | SIRAMI C, 2007, DIVERS DISTRIB            | 10.1111/j.1472-4642.2006.00297.x                |
| 65       | PRISHCHEPOV AV, 2012, REMOTE SENS ENVIRON | 10.1016/j.rse.2012.08.017                       |
| 66       | DUARTE F, 2008, J ENVIRON MANAGE          | 10.1016/j.jenvman.2007.05.024                   |
| 67       | MEYFROIDT P, 2016, GLOBAL ENVIRON CHANG   | 10.1016/j.gloenvcha.2016.01.003                 |
| 68       | LEVERS C, 2018, SCI TOTAL ENVIRON         | 10.1016/j.scitotenv.2018.06.326                 |
| 69       | CHERRY DS, 2001, ENVIRON POLLUT           | 10.1016/S0269-7491(00)00093-2                   |
| 70       | GIBSON CWD, 1987, BIOL CONSERV            | 10.1016/0006-3207(87)90132-7                    |
| 71       | YIN H, 2018, REMOTE SENS ENVIRON          | 10.1016/j.rse.2018.02.050                       |
| 72       | BENJAMIN K, 2005, LANDSCAPE ECOL          | 10.1007/s10980-005-0068-2                       |
| 73       | PREVOSTO B, 2011, FOLIA GEOBOT            | 10.1007/s12224-010-9096-z                       |
| 74       | ZHANG KR, 2010, FOREST ECOL MANAG         | 10.1016/j.foreco.2010.02.014                    |
| 75       | BENAYAS JMR, 2005, FOREST ECOL MANAG      | 10.1016/j.foreco.2005.03.032                    |
| 76       | ROMERO-DIAZ A, 2017, CATENA               | 10.1016/j.catena.2016.08.013                    |
| 77       | ZHANG JT, 2005, J ARID ENVIRON            | 10.1016/j.jaridenv.2005.03.027                  |
| 78       | PICHTEL JR, 1994, J ENVIRON QUAL          | 10.2134/jeq1994.00472425002300040022x           |
| 79       | SANCHEZ-CUERVO AM, 2013, ECOSYSTEMS       | 10.1007/s10021-013-9667-y                       |

| Sequence | Paper                                      | DOI                               |
|----------|--------------------------------------------|-----------------------------------|
| 80       | MEINERS SJ, 2001, ECOGRAPHY                | 10.1034/j.1600-0587.2001.240602.x |
| 81       | SPERA SA, 2014, ENVIRON RES LETT           | 10.1088/1748-9326/9/6/064010      |
| 82       | PAZUR R, 2014, APPL GEOGR                  | 10.1016/j.apgeog.2014.07.014      |
| 83       | JOHANSSON T, 1999, BIOMASS BIOENERG-a      | 10.1016/S0961-9534(98)00075-0     |
| 84       | WANG B, 2013, EARTH SURF PROC LAND         | 10.1002/esp.3459                  |
| 85       | LESSCHEN JP, 2008, J ARID ENVIRON          | 10.1016/j.jaridenv.2008.06.006    |
| 86       | GARCIA-RUIZ JM, 2005, CATENA               | 10.1016/j.catena.2004.05.006      |
| 87       | CERDA A, 2018, PROG PHYS GEOG              | 10.1177/0309133318758521          |
| 88       | COLON SM, 2006, BIOTROPICA                 | 10.1111/j.1744-7429.2006.00159.x  |
| 89       | HOOPER ER, 2004, ECOLOGY                   | 10.1890/03-0655                   |
| 90       | KAUFFMAN JB, 2009, ECOL APPL               | 10.1890/08-1696.1                 |
| 91       | HARMER R, 2001, BIOL CONSERV               | 10.1016/S0006-3207(01)00072-6     |
| 92       | XIE HL, 2014, SUSTAINABILITY-BASEL         | 10.3390/su6031260                 |
| 93       | NOVARA A, 2016, SCI TOTAL ENVIRON          | 10.1016/j.scitotenv.2016.01.095   |
| 94       | NOVARA A, 2017, SCI TOTAL ENVIRON          | 10.1016/j.scitotenv.2016.10.123   |
| 95       | NADAL-ROMERO E, 2016, AGR ECOSYST ENVIRON  | 10.1016/j.agee.2016.05.003        |
| 96       | CORBELLE-RICO E, 2012, LAND USE POLICY     | 10.1016/j.landusepol.2011.08.008  |
| 97       | HARDEN CP, 1996, MT RES DEV                | 10.2307/3673950                   |
| 98       | GISPERT M, 2013, GEODERMA                  | 10.1016/j.geoderma.2013.03.012    |
| 99       | PRICE B, 2015, APPL GEOGR                  | 10.1016/j.apgeog.2014.12.009      |
| 100      | SIKOR T, 2009, WORLD DEV                   | 10.1016/j.worlddev.2008.08.013    |
| 101      | VASSILEV K, 2011, PLANT BIOSYST            | 10.1080/11263504.2011.601337      |
| 102      | SHANG ZH, 2008, LAND DEGRAD DEV            | 10.1002/ldr.861                   |
| 103      | MULLER D, 2008, ANN ASSOC AM GEOGR         | 10.1080/00045600802262323         |
| 104      | URI V, 2002, FOREST ECOL MANAG             | 10.1016/S0378-1127(01)00478-9     |
| 105      | GRADINARU SR, 2015, ECOL INDIC             | 10.1016/j.ecolind.2015.05.009     |
| 106      | KNOKE T, 2014, NAT COMMUN                  | 10.1038/ncomms6612                |
| 107      | UEMATSU Y, 2010, AGR ECOSYST ENVIRON       | 10.1016/j.agee.2009.10.010        |
| 108      | PUEYO Y, 2007, LANDSCAPE URBAN PLAN        | 10.1016/j.landurbplan.2007.04.008 |
| 109      | CREMASCHI M, 2006, QUATERN INT             | 10.1016/j.quaint.2006.01.020      |
| 110      | SHEFFER E, 2012, ANN FOREST SCI            | 10.1007/s13595-011-0181-0         |
| 111      | MALJANEN M, 2007, BOREAL ENVIRON RES       | NA                                |
| 112      | HACKWORTH J, 2014, PROG PLANN              | 10.1016/j.progress.2013.03.004    |
| 113      | DENG L, 2016, ECOL ENG                     | 10.1016/j.ecoleng.2016.01.086     |
| 114      | WEISSTEINER CJ, 2011, GLOBAL PLANET CHANGE | 10.1016/j.gloplacha.2011.07.009   |
| 115      | DARA A, 2018, REMOTE SENS ENVIRON          | 10.1016/j.rse.2018.05.005         |
| 116      | USTAOGU E, 2018, ENVIRON REV               | 10.1139/er-2018-0001              |
| 117      | MOUILLOT F, 2005, LANDSCAPE ECOL           | 10.1007/s10980-004-1297-5         |
| 118      | DENG L, 2013, PLOS ONE                     | 10.1371/journal.pone.0071923      |
| 119      | FOOTE RL, 2010, ECOSYSTEMS                 | 10.1007/s10021-010-9355-0         |
| 120      | OTERO I, 2015, ECOL SOC                    | 10.5751/ES-07378-200207           |
| 121      | RODRIGO-COMINO J, 2018, PEDOSPHERE         | 10.1016/S1002-0160(17)60441-7     |

| Sequence | Paper                                      | DOI                                   |
|----------|--------------------------------------------|---------------------------------------|
| 122      | KOLECKA N, 2017, APPL GEOGR                | 10.1016/j.apgeog.2017.09.002          |
| 123      | MENKIS A, 2006, PLANT PATHOL               | 10.1111/j.1365-3059.2005.01295.x      |
| 124      | SMALIYCHUK A, 2016, GLOBAL ENVIRON CHANG   | 10.1016/j.gloenvcha.2016.02.009       |
| 125      | SALIFU KF, 2009, RESTOR ECOL               | 10.1111/j.1526-100X.2008.00373.x      |
| 126      | DEININGER K, 2012, WORLD DEV               | 10.1016/j.worlddev.2012.05.010        |
| 127      | RUSKULE A, 2013, LANDSCAPE URBAN PLAN      | 10.1016/j.landurbplan.2013.03.012     |
| 128      | SKOUSEN JG, 1994, J ENVIRON QUAL           | 10.2134/jeq1994.00472425002300060015x |
| 129      | TRUAX B, 2012, FOREST ECOL MANAG           | 10.1016/j.foreco.2011.12.012          |
| 130      | HAASE P, 1997, J VEG SCI                   | 10.2307/3237366                       |
| 131      | KORTHALS GW, 2001, FUNCT ECOL              | 10.1046/j.0269-8463.2001.00551.x      |
| 132      | LANA-RENAULT N, 2009, EARTH SURF PROC LAND | 10.1002/esp.1825                      |
| 133      | GONZALEZ JE, 1994, FOREST ECOL MANAG       | NA                                    |
| 134      | PALOMBO C, 2013, PLANT BIOSYST             | 10.1080/11263504.2013.772081          |
| 135      | SANDERSON FJ, 2013, AGR ECOSYST ENVIRON    | 10.1016/j.agee.2013.01.015            |
| 136      | JIANG JP, 2009, PEDOSPHERE                 | 10.1016/S1002-0160(09)60169-7         |
| 137      | LEMENIH M, 2004, FOREST ECOL MANAG         | 10.1016/j.foreco.2004.02.055          |
| 138      | CAMMERAAT ELH, 2010, ECOHYDROLOGY          | 10.1002/eco.161                       |
| 139      | KOU M, 2016, LAND DEGRAD DEV               | 10.1002/ldr.2356                      |
| 140      | SCHRODER P, 2008, ENVIRON SCI POLLUT R     | 10.1065/espr2008.03.481               |
| 141      | BENJAMIN K, 2007, LANDSCAPE URBAN PLAN     | 10.1016/j.landurbplan.2007.04.009     |
| 142      | RIVERA LW, 2000, PLANT ECOL                | 10.1023/A:1009825211430               |
| 143      | URI V, 2007, EUR J FOREST RES              | 10.1007/s10342-007-0171-9             |
| 144      | DORMAAR JF, 1985, J RANGE MANAGE           | 10.2307/3899737                       |
| 145      | LI SF, 2018, LAND DEGRAD DEV               | 10.1002/ldr.2924                      |
| 146      | WANG GL, 2009, PLANT SOIL                  | 10.1007/s11104-008-9773-3             |
| 147      | JIAO F, 2013, ECOL ENG                     | 10.1016/j.ecoleng.2013.06.036         |
| 148      | BRANDOLINI P, 2018, LAND DEGRAD DEV        | 10.1002/ldr.2672                      |
| 149      | ZHANG Y, 2016, J RURAL STUD                | 10.1016/j.jrurstud.2016.06.019        |
| 150      | PYWELL RF, 1995, J APPL ECOL               | 10.2307/2405106                       |
| 151      | LOW F, 2015, APPL GEOGR                    | 10.1016/j.apgeog.2015.05.009          |
| 152      | KUITERS AT, 2003, FOREST ECOL MANAG        | 10.1016/S0378-1127(03)00136-1         |
| 153      | STOVER ME, 1998, J TORREY BOT SOC          | 10.2307/2997302                       |
| 154      | ZUMKEHR A, 2013, ENVIRON SCI TECHNOL       | 10.1021/es3033132                     |
| 155      | DENG X, 2019, LAND USE POLICY              | 10.1016/j.landusepol.2019.104243      |
| 156      | YU Z, 2018, GLOBAL ECOL BIOGEOGR           | 10.1111/geb.12697                     |
| 157      | ZHAO D, 2017, SOIL TILL RES                | 10.1016/j.still.2016.08.007           |
| 158      | NUNES AN, 2010, LAND DEGRAD DEV            | 10.1002/ldr.973                       |
| 159      | ESCRIBANO-AVILA G, 2014, J APPL ECOL       | 10.1111/1365-2664.12340               |
| 160      | EMRAN M, 2012, EUR J SOIL SCI              | 10.1111/j.1365-2389.2012.01493.x      |
| 161      | KOLECKA N, 2015, REMOTE SENS-BASEL         | 10.3390/rs70708300                    |
| 162      | LOPEZ BN, 2011, ARCH ENVIRON CON TOX       | 10.1007/s00244-010-9590-6             |
| 163      | WEI XR, 2013, BIOL FERT SOILS              | 10.1007/s00374-012-0754-6             |

| Sequence | Paper                                  | DOI                              |
|----------|----------------------------------------|----------------------------------|
| 164      | ALVES DS, 2003, INT J REMOTE SENS      | 10.1080/0143116021000015807      |
| 165      | LABAUNE C, 2002, GLOBAL ECOL BIOGEOGR  | 10.1046/j.1466-822X.2002.00280.x |
| 166      | YELOFF D, 2007, J BIOGEOGR             | 10.1111/j.1365-2699.2006.01674.x |
| 167      | RAIESI F, 2012, PLANT SOIL             | 10.1007/s11104-011-0941-5        |
| 168      | ZHANG Q, 2018, LAND USE POLICY         | 10.1016/j.landusepol.2018.01.001 |
| 169      | JOHANSSON T, 2000, BIOMASS BIOENERG    | 10.1016/S0961-9534(99)00078-1    |
| 170      | HAN XY, 2018, AGR ECOSYST ENVIRON      | 10.1016/j.agee.2018.02.006       |
| 171      | JIAO JY, 2007, RESTOR ECOL             | 10.1111/j.1526-100X.2007.00235.x |
| 172      | LATOCHA A, 2016, CATENA                | 10.1016/j.catena.2016.05.027     |
| 173      | URI V, 2011, ECOL ENG                  | 10.1016/j.ecoleng.2011.01.016    |
| 174      | FIGUEIREDO J, 2011, LANDSCAPE ECOL     | 10.1007/s10980-011-9605-3        |
| 175      | ZHANG C, 2012, EUR J SOIL BIOL         | 10.1016/j.ejsobi.2012.01.002     |
| 176      | LENDI M, 2012, P ROY SOC B-BIOL SCI    | 10.1098/rspb.2011.2153           |
| 177      | RIES JB, 2008, CATENA                  | 10.1016/j.catena.2007.06.001     |
| 178      | GONZALEZ G, 1996, PEDOBIOLOGIA         | NA                               |
| 179      | RYU BG, 2009, SEP SCI TECHNOL          | 10.1080/01496390902983778        |
| 180      | KIVINEN S, 2017, SUSTAINABILITY-BASEL  | 10.3390/su9101705                |
| 181      | SLOAN S, 2016, LANDSCAPE ECOL          | 10.1007/s10980-015-0267-4        |
| 182      | LOW F, 2018, REMOTE SENS-BASEL         | 10.3390/rs10020159               |
| 183      | TANG KL, 1998, CHINESE SCI BULL        | 10.1007/BF02883721               |
| 184      | JIAO JY, 2008, PEDOSPHERE              | 10.1016/S1002-0160(07)60099-X    |
| 185      | VAN LEEUWEN CCE, 2019, LAND USE POLICY | 10.1016/j.landusepol.2019.01.018 |
| 186      | BRAMBILLA M, 2007, BIRD STUDY          | 10.1080/00063650709461471        |
| 187      | RUSKULE A, 2012, AGROFOREST SYST       | 10.1007/s10457-012-9495-7        |
| 188      | STANDISH RJ, 2008, J APPL ECOL         | 10.1111/j.1365-2664.2008.01558.x |
| 189      | XU DD, 2019, LAND USE POLICY           | 10.1016/j.landusepol.2019.104164 |
| 190      | WANG H, 2018, GEODERMA                 | 10.1016/j.geoderma.2018.03.037   |
| 191      | GABARRON-GALEOTE MA, 2015, GEODERMA    | 10.1016/j.geoderma.2015.03.007   |
| 192      | HERRANDO S, 2016, ENVIRON CONSERV      | 10.1017/S0376892915000260        |
| 193      | URI V, 2007, BIOMASS BIOENERG          | 10.1016/j.biombioe.2006.08.003   |
| 194      | FRESCHET GT, 2014, ECOLOGY             | 10.1890/13-0824.1                |
| 195      | OTERO I, 2011, LAND USE POLICY         | 10.1016/j.landusepol.2010.06.002 |
| 196      | JOHANSSON T, 1999, SILVA FENN          | 10.14214/sf.649                  |
| 197      | LESIV M, 2018, SCI DATA                | 10.1038/sdata.2018.56            |
| 198      | MENKIS A, 2007, MYCORRHIZA             | 10.1007/s00572-007-0110-0        |
| 199      | TRUAX B, 2014, FORESTS                 | 10.3390/f5123107                 |
| 200      | ZHANG C, 2015, ECOL ENG                | 10.1016/j.ecoleng.2014.11.059    |
| 201      | ORLANDI S, 2016, BIODIVERS CONSERV     | 10.1007/s10531-016-1046-5        |
| 202      | LI YY, 2015, ECOL RES                  | 10.1007/s11284-014-1230-6        |
| 203      | ZHANG W, 2019, SOIL BIOL BIOCHEM       | 10.1016/j.soilbio.2019.03.017    |
| 204      | ALONSO-SARRIA F, 2016, LAND DEGRAD DEV | 10.1002/ldr.2447                 |
| 205      | WITMER FDW, 2008, INT J REMOTE SENS    | 10.1080/01431160801891879        |

| Sequence | Paper                                      | DOI                                                                |
|----------|--------------------------------------------|--------------------------------------------------------------------|
| 206      | LI JJ, 2013, J SOIL SEDIMENT               | 10.1007/s11368-013-0652-z                                          |
| 207      | SCOZZAFAVA S, 2006, LANDSCAPE URBAN PLAN   | 10.1016/j.landurbplan.2004.10.006                                  |
| 208      | BLAIR D, 2018, LAND-BASEL                  | 10.3390/land7040121                                                |
| 209      | NIKOLOV SC, 2010, BIRD CONSERV INT         | 10.1017/S0959270909990244                                          |
| 210      | AGNOLETTI M, 2019, SUSTAINABILITY-BASEL    | 10.3390/su11010235                                                 |
| 211      | BANERJEE MJ, 2006, RESTOR ECOL             | 10.1111/j.1526-100X.2006.00142.x                                   |
| 212      | DE BAETS S, 2013, SOIL USE MANAGE          | 10.1111/sum.12017                                                  |
| 213      | WERTEBACH TM, 2017, GLOBAL CHANGE BIOL     | 10.1111/gcb.13650                                                  |
| 214      | FERNANDEZ-CALVINO D, 2008, LAND DEGRAD DEV | 10.1002/ldr.831                                                    |
| 215      | LOPEZ-VICENTE M, 2011, J SOIL SEDIMENT     | 10.1007/s11368-011-0428-2                                          |
| 216      | REY-BENAYAS JM, 2010, FOREST ECOL MANAG    | 10.1016/j.foreco.2010.04.004<br>3.0.CO;2-1"                        |
| 217      | LLORENS P, 1997, EARTH SURF PROC LAND      | target="_blank">10.1002/(SICI)1096-<br>9837(199711)22:113.0.CO;2-1 |
| 218      | SHI TC, 2018, LAND USE POLICY              | 10.1016/j.landusepol.2017.10.039                                   |
| 219      | SPOHN M, 2016, PLANT SOIL                  | 10.1007/s11104-015-2513-6                                          |
| 220      | KUHMAN TR, 2011, CAN J FOREST RES          | 10.1139/X11-026                                                    |
| 221      | WALTHER P, 1986, MT RES DEV                | 10.2307/3673371                                                    |
| 222      | ALIX-GARCIA J, 2012, LAND ECON             | 10.3368/le.88.3.425                                                |
| 223      | ZARAGOZI B, 2012, AGR ECOSYST ENVIRON      | 10.1016/j.agee.2012.03.019                                         |
| 224      | IOFFE G, 2012, EURASIAN GEOGR ECON         | 10.2747/1539-7216.53.4.527                                         |
| 225      | BENAYAS JMR, 2004, FOREST ECOL MANAG       | 10.1016/j.foreco.2004.02.035                                       |
| 226      | JOHNSON CD, 1995, J ENVIRON QUAL           | 10.2134/jeq1995.00472425002400040014x                              |
| 227      | FILHO WL, 2017, INT J SUST DEV WORLD       | 10.1080/13504509.2016.1240113                                      |
| 228      | GIRAUDOUX P, 1994, ACTA OECOL              | NA                                                                 |
| 229      | SANZ ASR, 2013, ECOL SOC                   | 10.5751/ES-05556-180238                                            |
| 230      | URI V, 2003, FOREST ECOL MANAG             | 10.1016/S0378-1127(03)00210-X                                      |
| 231      | ALBERTI G, 2011, REG ENVIRON CHANGE        | 10.1007/s10113-011-0229-6                                          |
| 232      | GELLRICH M, 2007, ENVIRON MODEL ASSESS     | 10.1007/s10666-006-9062-6                                          |
| 233      | DONG JW, 2011, ENVIRON MONIT ASSESS        | 10.1007/s10661-010-1724-9                                          |
| 234      | HERRANDO S, 2014, ECOL INDIC               | 10.1016/j.ecolind.2014.04.011                                      |
| 235      | JOHANSSON T, 2007, FORESTRY                | 10.1093/forestry/cpl049                                            |
| 236      | DENG X, 2018, INT J ENV RES PUB HE         | 10.3390/ijerph15091808                                             |
| 237      | COGLIASTRO A, 1997, FOREST ECOL MANAG      | 10.1016/S0378-1127(97)00042-X                                      |
| 238      | KATAYAMA N, 2015, AGR ECOSYST ENVIRON      | 10.1016/j.agee.2015.08.014                                         |
| 239      | WANG J, 2019, SOIL TILL RES                | 10.1016/j.still.2019.104305                                        |
| 240      | WOODS K, 2004, J TROP FOR SCI              | NA                                                                 |
| 241      | ZAKKAK S, 2015, J ENVIRON MANAGE           | 10.1016/j.jenvman.2015.09.005                                      |
| 242      | UCHIDA K, 2015, J APPL ECOL                | 10.1111/1365-2664.12443                                            |
| 243      | WITMER FDW, 2009, ANN ASSOC AM GEOGR       | 10.1080/00045600903260697                                          |
| 244      | URI V, 2009, FORESTRY                      | 10.1093/forestry/cpn040                                            |
| 245      | ORLOWSKI G, 2005, AGR ECOSYST ENVIRON      | 10.1016/j.agee.2005.06.012                                         |

| Sequence | Paper                                                                                                                       | DOI                                   |
|----------|-----------------------------------------------------------------------------------------------------------------------------|---------------------------------------|
| 246      | WEI XR, 2012, PLOS ONE                                                                                                      | 10.1371/journal.pone.0032054          |
| 247      | BOCIO I, 2004, ANN FOREST SCI                                                                                               | 10.1051/forest:2004009                |
| 248      | ZAKKAK S, 2014, J NAT CONSERV                                                                                               | 10.1016/j.jnc.2013.11.001             |
| 249      | SU GD, 2018, SUSTAINABILITY-BASEL                                                                                           | 10.3390/su10103676                    |
| 250      | HAN Z, 2019, J CLEAN PROD                                                                                                   | 10.1016/j.jclepro.2019.117888         |
| 251      | BRINKERT A, 2016, BIODIVERS CONSERV                                                                                         | 10.1007/s10531-015-1020-7             |
| 252      | GRANTZ DA, 1998, J ENVIRON QUAL                                                                                             | 10.2134/jeq1998.00472425002700040033x |
| 253      | GABARRON-GALEORE MA, 2015, AGR ECOSYST ENVIRON                                                                              | 10.1016/j.agee.2014.08.027            |
| 254      | LARSSON S, 2005, BIOMASS BIOENERG                                                                                           | 10.1016/j.biombioe.2004.05.003        |
| 255      | YUAN ZQ, 2016, SCI TOTAL ENVIRON                                                                                            | 10.1016/j.scitotenv.2015.09.108       |
| 256      | LIANG Y, 2020, J HYDROL                                                                                                     | 10.1016/j.jhydrol.2020.124694         |
| 257      | PEDRINI P, 2001, BIRD STUDY                                                                                                 | 10.1080/00063650109461218             |
| 258      | GRADINARU SR, 2019, ECOL INDIC                                                                                              | 10.1016/j.ecolind.2017.06.022         |
| 259      | HERBERT DA, 2003, BIOGEOCHEMISTRY                                                                                           | 10.1023/A:1026020210887               |
| 260      | SOJNEKOVA M, 2015, ECOL ENG                                                                                                 | 10.1016/j.ecoleng.2015.01.042         |
| 261      | YIN H, 2020, REMOTE SENS ENVIRON                                                                                            | 10.1016/j.rse.2020.111873             |
| 262      | DODDS WK, 1996, SOIL BIOL BIOCHEM                                                                                           | 10.1016/0038-0717(96)00057-0          |
| 263      | KURGANOVA IN, 2007, EURASIAN SOIL SCI+                                                                                      | 10.1134/S1064229307010085             |
| 264      | LI JW, 2019, SCI TOTAL ENVIRON                                                                                              | 10.1016/j.scitotenv.2019.133613       |
| 265      | ROBLEDANO-AYMERICH F, 2014, AGR ECOSYST ENVIRON                                                                             | 10.1016/j.agee.2014.08.006            |
| 266      | ZHANG W, 2018, ECOL ENG                                                                                                     | 10.1016/j.ecoleng.2018.07.031         |
| 267      | AZEVEDO JC, 2011, LANDSCAPE ECOLOGY IN FOREST<br>MANAGEMENT AND CONSERVATION: CHALLENGES AND<br>SOLUTIONS FOR GLOBAL CHANGE | NA                                    |
| 268      | BENAYAS JMR, 2003, APPL VEG SCI                                                                                             | 10.1111/j.1654-109X.2003.tb00582.x    |
| 269      | NADAL-ROMERO E, 2016, SCI TOTAL ENVIRON                                                                                     | 10.1016/j.scitotenv.2016.05.031       |
| 270      | ZHANG C, 2017, ECOL APPL                                                                                                    | 10.1002/eap.1598                      |
| 271      | SIL A, 2019, ECOSYST SERV                                                                                                   | 10.1016/j.ecoser.2019.100908          |
| 272      | SHI TC, 2016, SUSTAINABILITY-BASEL                                                                                          | 10.3390/su8100988                     |
| 273      | KOSMAS C, 2015, CATENA                                                                                                      | 10.1016/j.catena.2014.02.006          |
| 274      | HE SX, 2016, CATENA                                                                                                         | 10.1016/j.catena.2015.01.027          |
| 275      | URI V, 2008, FOREST ECOL MANAG                                                                                              | 10.1016/j.foreco.2007.09.019          |
| 276      | SHOPE CL, 2006, APPL GEOCHEM                                                                                                | 10.1016/j.apgeochem.2005.11.004       |
| 277      | ESCRIBANO-AVILA G, 2012, PLOS ONE                                                                                           | 10.1371/journal.pone.0046993          |
| 278      | CHANG XF, 2017, LAND DEGRAD DEV                                                                                             | 10.1002/ldr.2679                      |
| 279      | ALLEN EB, 2005, ISR J PLANT SCI                                                                                             | 10.1560/65LM-55YH-GB49-5BJM           |
| 280      | JOHANSSON T, 1999, BIOMASS BIOENERG                                                                                         | 10.1016/S0961-9534(99)00073-2         |
| 281      | MARUSHIA RG, 2011, RESTOR ECOL                                                                                              | 10.1111/j.1526-100X.2009.00540.x      |
| 282      | JANUS J, 2019, ECOL ENG                                                                                                     | 10.1016/j.ecoleng.2019.06.017         |
| 283      | LOCKWELL J, 2012, PLANT SOIL                                                                                                | 10.1007/s11104-012-1251-2             |
| 284      | LLOVET J, 2009, INT J WILDLAND FIRE                                                                                         | 10.1071/WF07089                       |
| 285      | BONANOMI G, 2013, BIODIVERS CONSERV                                                                                         | 10.1007/s10531-013-0502-8             |

| Sequence | Paper                                                    | DOI                                             |
|----------|----------------------------------------------------------|-------------------------------------------------|
| 286      | LANA-RENAULT N, 2018, CUAD INVESTIG GEOGR                | 10.18172/cig.3475                               |
| 287      | SOCHACKI SJ, 2012, GCB BIOENERGY                         | 10.1111/j.1757-1707.2011.01139.x                |
| 288      | CHENG ZB, 2018, SCI TOTAL ENVIRON                        | 10.1016/j.scitotenv.2018.02.259                 |
| 289      | TOMAZ C, 2013, FOREST ECOL MANAG                         | 10.1016/j.foreco.2013.07.044                    |
| 290      | WANG C, 2016, SCI REP-UK                                 | 10.1038/srep37658                               |
| 291      | LUCAS-BORJA ME, 2019, WATER-SUI                          | 10.3390/w11030503                               |
| 292      | CUESTA B, 2012, ACTA OECOL                               | 10.1016/j.actao.2011.09.004                     |
| 293      | VAN DER ZANDEN EH, 2018, REG ENVIRON CHANGE              | 10.1007/s10113-018-1294-x                       |
| 294      | MALY S, 2000, BIOL FERT SOILS                            | 10.1007/s003740050634                           |
| 295      | ABOLINA E, 2015, LAND USE POLICY                         | 10.1016/j.landusepol.2015.08.022                |
| 296      | HOU J, 2014, GLOBAL PLANET CHANGE                        | 10.1016/j.gloplacha.2013.12.008                 |
| 297      | LOPEZ-SANGIL L, 2011, BIOL FERT SOILS                    | 10.1007/s00374-010-0510-8                       |
| 298      | HAGEMAN PL, 2000, ICARD 2000, VOLS I AND II, PROCEEDINGS | NA                                              |
| 299      | FETZEL T, 2014, ECOL ECON                                | 10.1016/j.ecolecon.2013.12.002                  |
| 300      | RUSSELL WB, 1986, CAN J BOT                              | 10.1139/b86-177                                 |
| 301      | SHAO JA, 2016, J GEOGR SCI                               | 10.1007/s11442-016-1263-6                       |
| 302      | GUILHERME JL, 2013, PLOS ONE                             | 10.1371/journal.pone.0073619                    |
| 303      | OHTSUKA T, 1999, ECOL RES                                | 10.1046/j.1440-1703.1999.143304.x               |
| 304      | NEWMASER SG, 2006, CAN J FOREST RES                      | 10.1139/X06-021                                 |
| 305      | CAVANI L, 2016, J ENVIRON MANAGE                         | 10.1016/j.jenvman.2016.07.050                   |
| 306      | MILENOV P, 2014, INT J APPL EARTH OBS                    | 10.1016/j.jag.2014.03.013                       |
| 307      | CASTRO H, 2010, PLANT SOIL                               | 10.1007/s11104-010-0333-2                       |
| 308      | GAMMONS CH, 2007, ENVIRON GEOL                           | 10.1007/s00254-007-0676-z                       |
| 309      | MUNTEANU C, 2017, REG ENVIRON CHANGE                     | 10.1007/s10113-016-1097-x                       |
| 310      | DEL PLIEGO PG, 2016, BIOL CONSERV                        | 10.1016/j.biocon.2016.07.038                    |
| 311      | MALAVASI M, 2018, REG ENVIRON CHANGE                     | 10.1007/s10113-018-1368-9                       |
| 312      | CASTILLO CP, 2020, SUSTAINABILITY-BASEL                  | 10.3390/su12020560                              |
| 313      | PENA-ANGULO D, 2019, CATENA                              | 10.1016/j.catena.2019.05.010                    |
| 314      | SIIPILEHTO J, 2001, SILVA FENN                           | 10.14214/sf.577                                 |
| 315      | PAZUR R, 2020, LAND-BASEL                                | 10.3390/land9090316                             |
| 316      | LIU AY, 2013, HEALTH PLACE                               | 10.1016/j.healthplace.2013.03.012               |
| 317      | DOREN RF, 1991, ENVIRON MANAGE                           | 10.1007/BF02393843                              |
| 318      | HUA XB, 2016, CROP PROT                                  | 10.1016/j.cropro.2016.03.005                    |
| 319      | XU F, 2019, HABITAT INT                                  | 10.1016/j.habitatint.2018.12.006                |
| 320      | BELL S, 2020, ENVIRON SCI POLICY                         | 10.1016/j.envsci.2020.03.018                    |
| 321      | HARRIS TM, 2016, J CLEAN PROD                            | 10.1016/j.jclepro.2015.09.057                   |
| 322      | KNOKE T, 2013, GLOBAL ENVIRON CHANG                      | 10.1016/j.gloenvcha.2013.07.004                 |
| 323      | JIA GM, 2010, PEDOSPHERE                                 | 10.1016/S1002-0160(10)60024-0                   |
| 324      | FONTI P, 2006, J VEG SCI                                 | 10.1658/1100-9233(2006)017[0103:TRSCDI]2.0.CO;2 |
| 325      | CELIS G, 2011, FOREST ECOL MANAG                         | 10.1016/j.foreco.2010.10.005                    |
| 326      | PEPE G, 2019, WATER-SUI                                  | 10.3390/w11081552                               |



| Sequence | Paper                                    | DOI                              |
|----------|------------------------------------------|----------------------------------|
| 327      | SCHALDACH R, 2007, REG ENVIRON CHANGE    | 10.1007/s10113-007-0034-4        |
| 328      | TREML V, 2016, J VEG SCI                 | 10.1111/jvs.12448                |
| 329      | WILSON CA, 2006, J ENVIRON MONITOR       | 10.1039/b516614d                 |
| 330      | KAMP J, 2018, AGR ECOSYST ENVIRON        | 10.1016/j.agee.2018.09.009       |
| 331      | CORBELLE-RICO E, 2014, LAND USE POLICY   | 10.1016/j.landusepol.2013.10.013 |
| 332      | CHENG ZB, 2019, SOIL TILL RES            | 10.1016/j.still.2018.12.015      |
| 333      | TRIGALET S, 2016, GEODERMA               | 10.1016/j.geoderma.2016.01.014   |
| 334      | WANG HL, 2017, SCI TOTAL ENVIRON         | 10.1016/j.scitotenv.2017.07.014  |
| 335      | TAKAHASHI K, 2006, FOREST ECOL MANAG     | 10.1016/j.foreco.2006.03.015     |
| 336      | LASANTA T, 1995, PHYS CHEM EARTH         | 10.1016/0079-1946(95)00042-9     |
| 337      | HOLMES MA, 2018, J ECOL                  | 10.1111/1365-2745.12970          |
| 338      | ALVAREZ-AYUSO E, 2016, SCI TOTAL ENVIRON | 10.1016/j.scitotenv.2015.10.054  |
| 339      | CERDA A, 2019, WATER-SUI                 | 10.3390/w11040824                |
| 340      | ROUNDY BA, 2001, ARID LAND RES MANAG     | 10.1080/153249801300000798       |
| 341      | VINOGRADOVS I, 2018, AGR ECOSYST ENVIRON | 10.1016/j.agee.2017.10.016       |
| 342      | KERCKHOF A, 2016, SPRINGERPLUS           | 10.1186/s40064-016-2079-7        |
| 343      | TOTH T, 1995, SOIL SCI                   | 10.1097/00010694-199509000-00007 |
| 344      | YUSOFF NM, 2017, INT J DIGIT EARTH       | 10.1080/17538947.2016.1216615    |
| 345      | HUSAIN R, 2019, PLOS ONE                 | 10.1371/journal.pone.0221570     |
| 346      | NADAL-ROMERO E, 2018, LAND DEGRAD DEV    | 10.1002/ldr.2542                 |
| 347      | JEDLICKA P, 2007, BIOLOGIA               | 10.2478/s11756-007-0017-4        |
| 348      | URSINO N, 2014, GEOPHYS RES LETT         | 10.1002/2014GL061560             |
| 349      | ERIKSSON E, 2006, SILVA FENN             | 10.14214/sf.317                  |
| 350      | CATORCI A, 2013, POL J ECOL              | NA                               |
| 351      | TIAN JH, 2017, PLANT SOIL                | 10.1007/s11104-017-3253-6        |
| 352      | CANESSA S, 2013, ORYX                    | 10.1017/S0030605311001542        |
| 353      | BUTA M, 2019, SUSTAINABILITY-BASEL       | 10.3390/su11123393               |
| 354      | WANG N, 2013, ECOL ENG                   | 10.1016/j.ecoleng.2012.12.055    |
| 355      | JANUS J, 2018, APPL GEOGR                | 10.1016/j.apgeog.2018.06.002     |
| 356      | VUICHARD N, 2009, ENVIRON SCI TECHNOL    | 10.1021/es901652t                |
| 357      | RUSKULE A, 2016, NEW FOREST              | 10.1007/s11056-016-9532-x        |
| 358      | VACQUIE LA, 2015, J MT SCI-ENGL          | 10.1007/s11629-014-3405-6        |
| 359      | VISOCKIENE JS, 2019, LAND USE POLICY     | 10.1016/j.landusepol.2019.01.013 |
| 360      | KRAUSE A, 2016, EARTH SYST DYNAM         | 10.5194/esd-7-745-2016           |
| 361      | CHAUDHARY S, 2018, SUSTAINABILITY-BASEL  | 10.3390/su10072331               |
| 362      | CARLES S, 2013, AGR ECOSYST ENVIRON      | 10.1016/j.agee.2012.12.013       |
| 363      | RAIESI F, 2012, J ARID ENVIRON           | 10.1016/j.jaridenv.2011.08.008   |
| 364      | ZHONG ZK, 2020, PLANT SOIL               | 10.1007/s11104-019-04415-0       |
| 365      | MEERS TL, 2008, J VEG SCI                | 10.3170/2008-8-18401             |
| 366      | ITO J, 2016, LAND USE POLICY             | 10.1016/j.landusepol.2016.06.020 |
| 367      | DU J, 2019, LAND-BASEL                   | 10.3390/land8120184              |
| 368      | MA WL, 2020, J AGR ECON                  | 10.1111/1477-9552.12375          |

| Sequence | Paper                                                                       | DOI                              |
|----------|-----------------------------------------------------------------------------|----------------------------------|
| 369      | KUUIRE VZ, 2016, AGR HUM VALUES                                             | 10.1007/s10460-015-9612-0        |
| 370      | ZHANG Y, 2018, LAND DEGRAD DEV                                              | 10.1002/ldr.3126                 |
| 371      | ARMOLAITIS K, 2007, BALT FOR                                                | NA                               |
| 372      | SMITH KS, 2000, ICARD 2000, VOLS I AND II, PROCEEDINGS                      | NA                               |
| 373      | LOPEZ-POMA R, 2014, INT J WILDLAND FIRE                                     | 10.1071/WF13150                  |
| 374      | LI WJ, 2017, LAND DEGRAD DEV                                                | 10.1002/ldr.2607                 |
| 375      | TAKAHASHI K, 2007, FOREST ECOL MANAG                                        | 10.1016/j.foreco.2007.05.014     |
| 376      | WANG JM, 2017, ECOL ENG                                                     | 10.1016/j.ecoleng.2017.02.001    |
| 377      | GISPERT M, 2018, CATENA                                                     | 10.1016/j.catena.2017.10.019     |
| 378      | KAWADA K, 2011, GRASSL SCI                                                  | 10.1111/j.1744-697X.2010.00209.x |
| 379      | KHORCHANI M, 2020, SCI TOTAL ENVIRON                                        | 10.1016/j.scitotenv.2020.137160  |
| 380      | YANG Y, 2020, ONE EARTH                                                     | 10.1016/j.oneear.2020.07.019     |
| 381      | GU DW, 2019, LAND USE POLICY                                                | 10.1016/j.landusepol.2019.02.033 |
| 382      | KUKK L, 2010, ACTA AGR SCAND B-S P                                          | 10.1080/09064710902798311        |
| 383      | CASTILLO CP, 2021, ENVIRON MODELL SOFTW                                     | 10.1016/j.envsoft.2020.104946    |
| 384      | RICOTTA C, 2012, NAT HAZARD EARTH SYS                                       | 10.5194/nhess-12-1333-2012       |
| 385      | TULLUS T, 2013, NEW FOREST                                                  | 10.1007/s11056-013-9365-9        |
| 386      | LIZAGA I, 2018, LAND DEGRAD DEV                                             | 10.1002/ldr.2843                 |
| 387      | ZOZAYA EL, 2012, LANDSCAPE ECOL                                             | 10.1007/s10980-011-9695-y        |
| 388      | YANG N, 2018, EUR J SOIL BIOL                                               | 10.1016/j.ejsobi.2018.01.003     |
| 389      | ZAKKAK S, 2014, J INSECT CONSERV                                            | 10.1007/s10841-014-9663-3        |
| 390      | HUTCHINSON I, 2007, RADIOCARBON                                             | 10.1017/S0033822200043198        |
| 391      | WEISS J, 2005, WILD URBAN WOODLANDS: NEW PERSPECTIVES<br>FOR URBAN FORESTRY | 10.1007/3-540-26859-6_9          |
| 392      | DYULGEROVA S, 2015, ACTA ZOOL BULGAR                                        | NA                               |
| 393      | CAMPBELL JE, 2013, ENVIRON RES LETT                                         | 10.1088/1748-9326/8/3/035012     |
| 394      | SANG N, 2014, APPL GEOGR                                                    | 10.1016/j.apgeog.2014.09.015     |
| 395      | LOMBA A, 2013, PLANT BIOSYST                                                | 10.1080/11263504.2012.716794     |
| 396      | ZAVALLONI M, 2021, LAND USE POLICY                                          | 10.1016/j.landusepol.2019.104365 |
| 397      | DE ANDRES F, 2007, SCI TOTAL ENVIRON                                        | 10.1016/j.scitotenv.2007.01.017  |
| 398      | CHEN YF, 2018, J MT SCI-ENGL                                                | 10.1007/s11629-017-4452-6        |
| 399      | KOZAK J, 2004, EKOL BRATISLAVA                                              | NA                               |
| 400      | YU ZL, 2017, SUSTAINABILITY-BASEL                                           | 10.3390/su9020187                |
| 401      | LIANG X, 2020, LAND USE POLICY                                              | 10.1016/j.landusepol.2020.104760 |
| 402      | NAVAS A, 2017, LAND DEGRAD DEV                                              | 10.1002/ldr.2724                 |
| 403      | TULLUS A, 2012, BALT FOR                                                    | NA                               |
| 404      | HELM DJ, 1993, MYCORRHIZA-a                                                 | 10.1007/BF00208918               |
| 405      | OCHIAI A, 2001, NEW ENGL QUART                                              | 10.2307/3185461                  |
| 406      | NAESS JS, 2021, NAT SUSTAIN                                                 | 10.1038/s41893-020-00680-5       |
| 407      | ZHOU T, 2020, ENVIRON MANAGE                                                | 10.1007/s00267-020-01258-9       |
| 408      | MULLER D, 2009, NATO SCI PEACE SECUR                                        | 10.1007/978-90-481-2283-7_24     |
| 409      | ZHU XF, 2021, SCI TOTAL ENVIRON                                             | 10.1016/j.scitotenv.2020.142651  |

| Sequence | Paper                                      | DOI                               |
|----------|--------------------------------------------|-----------------------------------|
| 410      | TIAN DS, 2018, LAND DEGRAD DEV             | 10.1002/ldr.3137                  |
| 411      | SIRAMI C, 2011, BIRD STUDY                 | 10.1080/00063657.2010.532861      |
| 412      | XU HW, 2020, LAND DEGRAD DEV               | 10.1002/ldr.3513                  |
| 413      | WANG N, 2010, ENVIRON MANAGE               | 10.1007/s00267-010-9535-x         |
| 414      | LAMERIS TK, 2016, BIODIVERS CONSERV        | 10.1007/s10531-015-1041-2         |
| 415      | HARRIS E, 2018, SCI TOTAL ENVIRON          | 10.1016/j.scitotenv.2018.02.119   |
| 416      | HE YF, 2020, LAND USE POLICY               | 10.1016/j.landusepol.2020.104826  |
| 417      | KHEIRFAM H, 2020, CATENA                   | 10.1016/j.catena.2019.104341      |
| 418      | LOHMUS A, 2005, CAN J FOREST RES           | 10.1139/X05-047                   |
| 419      | DORTA-SANTOS M, 2014, SUSTAINABILITY-BASEL | 10.3390/su6106902                 |
| 420      | XU HW, 2021, CATENA                        | 10.1016/j.catena.2020.104812      |
| 421      | PASALODOS-TATO M, 2009, SILVA FENN         | 10.14214/sf.176                   |
| 422      | SULIEMAN HM, 2009, LAND DEGRAD DEV         | 10.1002/ldr.894                   |
| 423      | HACKWORTH J, 2015, URBAN GEOGR             | 10.1080/02723638.2015.1011416     |
| 424      | BIRD DA, 2003, ENVIRON GEOL                | 10.1007/s00254-003-0835-9         |
| 425      | LOTTERMOSER BG, 2011, ENVIRON POLLUT       | 10.1016/j.envpol.2011.04.014      |
| 426      | NGUYEN H, 2018, REMOTE SENS-BASEL          | 10.3390/rs10121973                |
| 427      | LI JW, 2020, SCI TOTAL ENVIRON             | 10.1016/j.scitotenv.2020.140802   |
| 428      | PELTZ CD, 2016, SSSA SPEC PUBL             | 10.2136/sssaspecpub63.2014.0047.5 |
| 429      | DENG X, 2018, SUSTAINABILITY-BASEL         | 10.3390/su10113909                |
| 430      | DENG X, 2020, LAND-BASEL                   | 10.3390/land9100360               |
| 431      | XIAO GF, 2019, J GEOGR SCI                 | 10.1007/s11442-019-1616-z         |
| 432      | CHANG EH, 2019, CATENA                     | 10.1016/j.catena.2019.104095      |
| 433      | KOLECKA N, 2019, LAND-BASEL                | 10.3390/land8090129               |
| 434      | VOLARIK D, 2013, FOREST ECOL MANAG         | 10.1016/j.foreco.2012.12.016      |
| 435      | CHENG LL, 2017, INT J MIN RECLAM ENV       | 10.1080/17480930.2016.1167305     |
| 436      | KUMM KI, 2020, LAND-BASEL                  | 10.3390/land9020042               |
| 437      | SCOTT CA, 2001, BIOGEOCHEMISTRY            | 10.1023/A:1011877214723           |
| 438      | VAROTTO M, 2014, MT RES DEV                | 10.1659/MRD-JOURNAL-D-14-00012.1  |
| 439      | PAUDEL B, 2020, ENVIRON RES                | 10.1016/j.envres.2020.109711      |
| 440      | TREMBLAY S, 2013, FORESTS                  | 10.3390/f4041141                  |
| 441      | MIKULIC K, 2014, COMMUNITY ECOL            | 10.1556/COMEC.15.2014.2.5         |
| 442      | DORTA-SANTOS M, 2015, ECOL ENG             | 10.1016/j.ecoleng.2015.03.008     |
| 443      | YUSOFF NM, 2017, INT J REMOTE SENS         | 10.1080/01431161.2016.1266111     |
| 444      | AREVALO JR, 2017, ACTA OECOL               | 10.1016/j.actao.2017.09.014       |
| 445      | FALINSKI JB, 1980, ECOL POL-POL J ECOL     | NA                                |
| 446      | NADAL-ROMERO E, 2011, B ASOC GEOGR ESP     | NA                                |
| 447      | GUO YC, 2019, SUSTAINABILITY-BASEL         | 10.3390/su11051367                |
| 448      | DENG X, 2019, INT J ENV RES PUB HE         | 10.3390/ijerph16193588            |
| 449      | DE MIRANDA MD, 2019, SCI REP-UK            | 10.1038/s41598-018-38200-3        |
| 450      | BAXTER RE, 2017, ANN AM ASSOC GEOGR        | 10.1080/24694452.2017.1298985     |
| 451      | ORLOWSKI G, 2004, ACTA ORNITHOL            | NA                                |

| Sequence | Paper                                        | DOI                                |
|----------|----------------------------------------------|------------------------------------|
| 452      | KOLECKA N, 2018, REMOTE SENS-BASEL           | 10.3390/rs10101568                 |
| 453      | YAMAGUCHI T, 2016, J LAND USE SCI            | 10.1080/1747423X.2016.1174317      |
| 454      | MANTERO G, 2020, LANDSCAPE ECOL              | 10.1007/s10980-020-01147-w         |
| 455      | HACKWORTH J, 2018, INT J URBAN REGIONAL      | 10.1111/1468-2427.12588            |
| 456      | PARDINI G, 2006, AGROCHIMICA                 | NA                                 |
| 457      | RAUTIAINEN A, 2016, ENVIRON SCI POLICY       | 10.1016/j.envsci.2015.09.011       |
| 458      | ASSINI S, 2015, PLANT BIOSYST                | 10.1080/11263504.2014.983202       |
| 459      | ERSOY A, 2008, ENVIRON TOXICOL               | 10.1002/tox.20314                  |
| 460      | WEI XC, 2011, SCI TOTAL ENVIRON              | 10.1016/j.scitotenv.2010.11.030    |
| 461      | KUND M, 2010, EUR J FOREST RES               | 10.1007/s10342-010-0369-0          |
| 462      | DE GOEDE RGM, 1998, APPL SOIL ECOL           | 10.1016/S0929-1393(98)00089-4      |
| 463      | PUTTSEPP U, 2007, SILVA FENN                 | 10.14214/sf.294                    |
| 464      | ARCHER N, 2002, HYDROL EARTH SYST SC         | 10.5194/hess-6-913-2002            |
| 465      | HOUET T, 2015, J MT SCI-ENGL                 | 10.1007/s11629-014-3404-7          |
| 466      | GOGA T, 2019, REMOTE SENS-BASEL              | 10.3390/rs11232759                 |
| 467      | LASANTA T, 2020, LAND DEGRAD DEV             | 10.1002/ldr.3655                   |
| 468      | WANG JQ, 2016, J ARID LAND                   | 10.1007/s40333-016-0042-7          |
| 469      | DORMAAR JF, 1990, J RANGE MANAGE             | 10.2307/3898686                    |
| 470      | ONANS J, 1980, AUST J BOT                    | 10.1071/BT9800479                  |
| 471      | LOPEZ-IGLESIAS E, 2013, RES RURAL SOCIOL DEV | 10.1108/S1057-1922(2013)0000019007 |
| 472      | CHAUDHARY S, 2020, LAND-BASEL                | 10.3390/land9030084                |
| 473      | BENJAMIN K, 2008, ENVIRON MANAGE             | 10.1007/s00267-008-9176-5          |
| 474      | LI JW, 2020, GEODERMA                        | 10.1016/j.geoderma.2019.114167     |
| 475      | DESIMINI J, 2013, J LANDSC ARCHIT            | 10.1080/18626033.2013.864131       |
| 476      | HALL SJG, 2018, AGR SYST                     | 10.1016/j.agsy.2018.08.009         |
| 477      | HANIOKA M, 2018, AGR ECOSYST ENVIRON         | 10.1016/j.agee.2018.06.014         |
| 478      | NAVARRO FB, 2006, LAND DEGRAD DEV            | 10.1002/ldr.695                    |
| 479      | PRISHCHEPOV AV, 2021, LAND USE POLICY        | 10.1016/j.landusepol.2021.105513   |
| 480      | MORELL-MONZO S, 2020, REMOTE SENS-BASEL      | 10.3390/rs12122062                 |
| 481      | JOHANSSON T, 1996, NEW FOREST                | NA                                 |
| 482      | WU DM, 2019, CHEMOSPHERE                     | 10.1016/j.chemosphere.2018.09.087  |
| 483      | HOU J, 2014, CATENA                          | 10.1016/j.catena.2013.11.009       |
| 484      | PALOMEQUE X, 2017, NEW FOREST                | 10.1007/s11056-017-9590-8          |
| 485      | BOSSO L, 2017, ACTA OECOL                    | 10.1016/j.actao.2016.11.002        |
| 486      | ZHANG K, 2012, SOIL USE MANAGE               | 10.1111/j.1475-2743.2012.00420.x   |
| 487      | FOUCHER A, 2019, AGR ECOSYST ENVIRON         | 10.1016/j.agee.2019.106582         |
| 488      | ZHANG LP, 2016, INT J ENV RES PUB HE         | 10.3390/ijerph13040354             |
| 489      | SHANG ZH, 2019, CATENA                       | 10.1016/j.catena.2018.12.002       |
| 490      | KOBAYASHI Y, 2020, PLOS ONE                  | 10.1371/journal.pone.0235846       |
| 491      | RAI R, 2019, SUSTAINABILITY-BASEL            | 10.3390/su11195267                 |
| 492      | JACOB AL, 2017, RESTOR ECOL                  | 10.1111/rec.12414                  |
| 493      | YANG HC, 2016, SUSTAINABILITY-BASEL          | 10.3390/su8111183                  |

| Sequence | Paper                                        | DOI                              |
|----------|----------------------------------------------|----------------------------------|
| 494      | LAUE JE, 2016, J LAND USE SCI                | 10.1080/1747423X.2014.993341     |
| 495      | HESTERBERG D, 1993, LAND DEGRAD REHABIL      | 10.1002/ldr.3400040409           |
| 496      | DOLTON-THORNTON N, 2021, LAND USE POLICY     | 10.1016/j.landusepol.2020.105269 |
| 497      | BELL SM, 2021, SCI TOTAL ENVIRON             | 10.1016/j.scitotenv.2020.143535  |
| 498      | KUNTZ KA, 2018, LAND-BASEL                   | 10.3390/land7040128              |
| 499      | PICHE N, 2015, RESTOR ECOL                   | 10.1111/rec.12241                |
| 500      | TROIANI N, 2016, ACTA BOT CROAT              | 10.1515/botcro-2016-0021         |
| 501      | KITAZAWA M, 2019, ORNITHOL SCI               | 10.2326/osj.18.3                 |
| 502      | LOPEZ-BAO JV, 2015, BASIC APPL ECOL          | 10.1016/j.baae.2014.12.001       |
| 503      | SROKA W, 2019, SUSTAINABILITY-BASEL          | 10.3390/su11113071               |
| 504      | RIEDENER E, 2014, AGR ECOSYST ENVIRON        | 10.1016/j.agee.2013.12.023       |
| 505      | UCHIDA K, 2018, J ENVIRON MANAGE             | 10.1016/j.jenvman.2018.04.059    |
| 506      | SANCHO-REINOSO A, 2013, ERDKUNDE             | 10.3112/erdkunde.2013.04.01      |
| 507      | GOPALAKRISHNAN T, 2020, SUSTAINABILITY-BASEL | 10.3390/su12093681               |
| 508      | GARCIA-BARON I, 2018, DIVERS DISTRIB         | 10.1111/ddi.12743                |
| 509      | SUBEDI YR, 2021, ENVIRON MANAGE              | 10.1007/s00267-021-01461-2       |
| 510      | LIU N, 2017, REMOTE SENS-BASEL               | 10.3390/rs9060545                |
| 511      | YANG LR, 2008, ENVIRON GEOL                  | 10.1007/s00254-007-0782-y        |
| 512      | INCZE J, 2016, J MAPS                        | 10.1080/17445647.2016.1195295    |
| 513      | WEI YC, 2009, J FOREST RES-JPN               | 10.1007/s10310-009-0130-z        |
| 514      | HELM DJ, 1993, MYCORRHIZA                    | 10.1007/BF00208917               |
| 515      | HUANG YQ, 2020, LAND-BASEL                   | 10.3390/land9080263              |
| 516      | VAN DER MERWE H, 2011, AFR J RANGE FOR SCI   | 10.2989/10220119.2011.642097     |
| 517      | LEIRPOLL ME, 2021, RENEW ENERG               | 10.1016/j.renene.2020.11.159     |
| 518      | YAMANAKA S, 2017, AGR ECOSYST ENVIRON        | 10.1016/j.agee.2017.07.027       |
| 519      | YANNELLI FA, 2014, ENVIRON MANAGE            | 10.1007/s00267-013-0176-8        |
| 520      | GRADINARU SR, 2013, PROC TECH                | 10.1016/j.protcy.2013.11.074     |
| 521      | BIJAK S, 2014, SYLWAN                        | NA                               |
| 522      | KOLECKA N, 2021, REMOTE SENS ENVIRON         | 10.1016/j.rse.2021.112340        |
| 523      | LASANTA T, 2019, ADV CHEM POLL ENV MG        | 10.1016/bs.apmp.2019.07.002      |
| 524      | WILLIAMS TM, 1999, FOREST ECOL MANAG         | 10.1016/S0378-1127(99)00031-6    |
| 525      | ZHANG FH, 2017, J AGR SCI-CAMBRIDGE          | 10.1017/S002185961600023X        |
| 526      | CAMPOS I, 2016, COMMUNITY DEV J              | 10.1093/cdj/bsv051               |
| 527      | SUN CL, 2018, FRONT PLANT SCI                | 10.3389/fpls.2018.00898          |
| 528      | MASNY M, 2014, CARPATH J EARTH ENV           | NA                               |
| 529      | WANG YW, 2020, AGR ECOSYST ENVIRON           | 10.1016/j.agee.2020.106821       |
| 530      | MCKINSTRY MC, 1994, WETLANDS                 | 10.1007/BF03160634               |
| 531      | CAMPO J, 2019, EUR J SOIL SCI                | 10.1111/ejss.12799               |
| 532      | HANIOKA M, 2018, BIODIVERS CONSERV           | 10.1007/s10531-018-1510-5        |
| 533      | PENG SL, 2012, SOIL RES                      | 10.1071/SR11149                  |
| 534      | AOSAAR J, 2011, BALT FOR                     | NA                               |
| 535      | LAWSON L, 2013, CITY 21ST CENTURY            | NA                               |

| Sequence | Paper                                       | DOI                                      |
|----------|---------------------------------------------|------------------------------------------|
| 536      | CARVER S, 2019, ECOL REV                    | NA                                       |
| 537      | SANKEY TT, 2018, LAND DEGRAD DEV            | 10.1002/ldr.2997                         |
| 538      | YUN SW, 2017, J GEOCHEM EXPLOR              | 10.1016/j.gexplo.2017.07.004             |
| 539      | JIA YF, 2011, ARID LAND RES MANAG           | 10.1080/15324982.2011.554959             |
| 540      | XU HW, 2020, CATENA                         | 10.1016/j.catena.2020.104774             |
| 541      | FREI T, 2020, LAND USE POLICY               | 10.1016/j.landusepol.2020.105034         |
| 542      | WAHSHA M, 2016, J SOIL SEDIMENT             | 10.1007/s11368-015-1151-1                |
| 543      | HEWELKE E, 2019, WATER-SUI                  | 10.3390/w11030525                        |
| 544      | ROSETO-VLASOVA OA, 2018, J APPL REMOTE SENS | 10.1117/1.JRS.12.042803                  |
| 545      | COJZER M, 2014, FORESTS                     | 10.3390/f5112658                         |
| 546      | SAVULESCU I, 2019, SUSTAINABILITY-BASEL     | 10.3390/su11236679                       |
| 547      | TULLUS T, 2015, CAN J FOREST RES            | 10.1139/cjfr-2014-0464                   |
| 548      | RAJPAR H, 2019, SUSTAINABILITY-BASEL        | 10.3390/su11174663                       |
| 549      | DEGRAFF JV, 2007, REV ENG GEOL              | 10.1130/2007.4017(01)                    |
| 550      | DE BAETS S, 2012, CATENA                    | 10.1016/j.catena.2012.01.014             |
| 551      | HUHE, 2014, PLOS ONE                        | 10.1371/journal.pone.0106714             |
| 552      | NEMET E, 2016, COMMUNITY ECOL               | 10.1556/168.2016.17.1.10                 |
| 553      | LIU K, 2020, AGR ECOSYST ENVIRON            | 10.1016/j.agee.2019.106746               |
| 554      | PIAS B, 2014, FOREST ECOL MANAG             | 10.1016/j.foreco.2014.06.021             |
| 555      | RICCI JMP, 2018, LAND USE POLICY            | 10.1016/j.landusepol.2018.08.009         |
| 556      | LIU M, 2021, AGR ECOSYST ENVIRON            | 10.1016/j.agee.2021.107629               |
| 557      | SIRIN A, 2018, LAND-BASEL                   | 10.3390/land7020071                      |
| 558      | CHENG LL, 2019, INT J COAL SCI TECHN        | 10.1007/s40789-019-0241-x                |
| 559      | PELLIS G, 2019, SCI TOTAL ENVIRON           | 10.1016/j.scitotenv.2019.03.329          |
| 560      | GOMES ACS, 2012, RESTOR ECOL                | 10.1111/j.1526-100X.2011.00773.x         |
| 561      | HOU DW, 2021, LANDSCAPE URBAN PLAN          | 10.1016/j.lurbplan.2021.104170           |
| 562      | RADOVIC AA, 2013, FOLIA ZOOL                | NA                                       |
| 563      | LU C, 2020, GROWTH CHANGE                   | 10.1111/grow.12431                       |
| 564      | JANUS J, 2019, J LAND USE SCI               | 10.1080/1747423X.2019.1709226            |
| 565      | HAN Z, 2020, APPL GEOGR                     | 10.1016/j.apgeog.2020.102245             |
| 566      | GRADINARU SR, 2020, CARPATH J EARTH ENV     | 10.26471/cjees/2020/015/119              |
| 567      | HUHE, 2016, PLOS ONE                        | 10.1371/journal.pone.0154697             |
| 568      | CHENG WF, 2011, SPECTROSC SPECT ANAL        | 10.3964/j.issn.1000-0593(2011)06-1615-06 |
| 569      | BAI WJ, 2010, ARID LAND RES MANAG           | 10.1080/15324981003635461                |
| 570      | QIU BW, 2020, LAND DEGRAD DEV               | 10.1002/ldr.3617                         |
| 571      | MACCHERINI S, 2013, BIODIVERS CONSERV       | 10.1007/s10531-013-0571-8                |
| 572      | YOSHIHARA Y, 2009, J ARID ENVIRON           | 10.1016/j.jaridenv.2008.09.017           |
| 573      | KEPFER-ROJAS S, 2015, APPL VEG SCI          | 10.1111/avsc.12169                       |
| 574      | THOGMARTIN WE, 2009, RESTOR ECOL            | 10.1111/j.1526-100X.2007.00344.x         |
| 575      | HEYDARI M, 2020, ECOL ENG                   | 10.1016/j.ecoleng.2020.105963            |
| 576      | LIU HF, 2019, LAND DEGRAD DEV               | 10.1002/ldr.3372                         |
| 577      | SILVESTRINI M, 2012, REV ARVORE             | 10.1590/S0100-67622012000400008          |

| Sequence | Paper                                     | DOI                                   |
|----------|-------------------------------------------|---------------------------------------|
| 578      | MAHANEY WM, 2010, PLANT SOIL              | 10.1007/s11104-009-0178-8             |
| 579      | YOSHIKAWA S, 2004, JARQ-JPN AGR RES Q     | 10.6090/jarq.38.21                    |
| 580      | SON Y, 2006, J PLANT BIOL                 | 10.1007/BF03030538                    |
| 581      | DING Y, 2005, J INTEGR PLANT BIOL         | 10.1111/j.1744-7909.2005.00026.x      |
| 582      | JANOVSKY MP, 2020, CATENA                 | 10.1016/j.catena.2019.104347          |
| 583      | KING MA, 1989, J RANGE MANAGE             | 10.2307/3899468                       |
| 584      | HAUCHHUM R, 2019, NUTR CYCL AGROECOSYS    | 10.1007/s10705-019-09972-5            |
| 585      | HEIDER K, 2021, REG ENVIRON CHANGE        | 10.1007/s10113-020-01739-x            |
| 586      | ZENG LZ, 1993, AUST GEOGR                 | NA                                    |
| 587      | ZAKKAK S, 2018, J VEG SCI                 | 10.1111/jvs.12670                     |
| 588      | ZHANG Z, 2017, J SOIL SEDIMENT            | 10.1007/s11368-017-1650-3             |
| 589      | GARDINER DT, 1993, ARID SOIL RES REHAB    | 10.1080/15324989309381337             |
| 590      | SEDLAR Z, 2018, PLANT BIOSYST             | 10.1080/11263504.2017.1330774         |
| 591      | SHIN MW, 2020, SUSTAINABILITY-BASEL       | 10.3390/su12010334                    |
| 592      | CHAUDHARY S, 2020, LAND-BASEL-a           | 10.3390/land9010001                   |
| 593      | ROBLES AB, 2002, J ARID ENVIRON           | 10.1006/jare.2001.0913                |
| 594      | KOLECKA N, 2016, INT ARCH PHOTOGRAMM      | 10.5194/isprsarchives-XLI-B8-931-2016 |
| 595      | LEMIEUX C, 1998, PHYTOPROTECTION          | 10.7202/706132ar                      |
| 596      | RODRIGUEZ-FRANCO C, 2021, BIOCHAR         | 10.1007/s42773-020-00074-y            |
| 597      | GOPALAKRISHNAN T, 2021, AGRICULTURE-BASEL | 10.3390/agriculture11030211           |
| 598      | WANG HL, 2020, LAND DEGRAD DEV            | 10.1002/ldr.3523                      |
| 599      | WANG JS, 2013, EUR J FOREST RES           | 10.1007/s10342-012-0676-8             |
| 600      | DING Y, 2006, J INTEGR PLANT BIOL         | 10.1111/j.1744-7909.2006.00262.x      |
| 601      | WANG HL, 2019, APPL MICROBIOL BIOT        | 10.1007/s00253-018-09575-0            |
| 602      | LI JJ, 2011, SOIL SCI                     | 10.1097/SS.0b013e31821d6e7c           |
| 603      | TABENI S, 2016, ECOL INDIC                | 10.1016/j.ecolind.2016.02.019         |
| 604      | VAZ AS, 2019, LANDSCAPE URBAN PLAN        | 10.1016/j.landurbplan.2019.01.009     |
| 605      | GOMORY D, 2006, POL J ECOL                | NA                                    |
| 606      | GISI U, 1981, ACTA OECOL-OEC PLANT-a-b    | NA                                    |
| 607      | TAROLLI P, 2019, ENVIRON HIST-SER         | 10.1007/978-3-319-96815-5_12          |
| 608      | KOBAYASHI Y, 2018, ECOL RES MONOGR-a      | 10.1007/978-981-10-7203-1_13          |
| 609      | ZGLOBICKI W, 2020, APPL SCI-BASEL         | 10.3390/app10103500                   |
| 610      | DUBOVYK O, 2012, INT GEOSCI REMOTE SE     | 10.1109/IGARSS.2012.6352089           |
| 611      | ZAKKAK S, 2015, AMPHIBIA-REPTILIA         | 10.1163/15685381-00003002             |
| 612      | NEKHAY O, 2009, SPAN J AGRIC RES          | NA                                    |
| 613      | ZHAO YG, 2019, ARCH MICROBIOL             | 10.1007/s00203-019-01689-x            |
| 614      | REBELE F, 2014, TUENXENIA                 | NA                                    |
| 615      | ESTRUCH C, 2018, PLANT SOIL               | 10.1007/s11104-018-3581-1             |
| 616      | MIDRIAK R, 1995, EKOL BRATISLAVA          | NA                                    |
| 617      | AN Y, 2019, COMMUNITY ECOL                | 10.1556/168.2019.20.1.3               |
| 618      | WANG R, 2019, LAND-BASEL                  | 10.3390/land8120186                   |
| 619      | ZAMBON I, 2018, SUSTAINABILITY-BASEL      | 10.3390/su10041159                    |

| Sequence | Paper                                       | DOI                                         |
|----------|---------------------------------------------|---------------------------------------------|
| 620      | DAX T, 2021, LAND-BASEL                     | 10.3390/land10060591                        |
| 621      | SACKOV I, 2020, REMOTE SENS-BASEL           | 10.3390/rs12244189                          |
| 622      | BARRENA-GONZALEZ J, 2020, CENT EURO FOR J   | 10.2478/forj-2020-0015                      |
| 623      | SCHERER G, 2021, INSECT CONSERV DIVER       | 10.1111/icad.12485                          |
| 624      | HORASAN BY, 2020, ENVIRON EARTH SCI         | 10.1007/s12665-020-08985-6                  |
| 625      | MIHALIK J, 2011, WATER AIR SOIL POLL        | 10.1007/s11270-010-0518-6                   |
| 626      | MINOTTA G, 2011, IFOREST                    | 10.3832/for0560-004                         |
| 627      | LIU XH, 2020, SCI TOTAL ENVIRON             | 10.1016/j.scitotenv.2020.137148             |
| 628      | MEDVEDEVA MA, 2017, IZV ATMOS OCEAN PHY+    | 10.1134/S0001433817090201                   |
| 629      | LIU XZ, 2011, AFR J BIOTECHNOL              | NA                                          |
| 630      | KHANINA LG, 2018, ECOL PROCESS              | 10.1186/s13717-018-0150-8                   |
| 631      | GISI U, 1981, ACTA OECOL-OEC PLANT-a-b-c    | NA                                          |
| 632      | SONG W, 2019, SUSTAINABILITY-BASEL          | 10.3390/su11215951                          |
| 633      | YANG JD, 2019, ECOL ENG                     | 10.1016/j.ecoleng.2019.04.026               |
| 634      | WANG YH, 2020, SUSTAINABILITY-BASEL         | 10.3390/su12083356                          |
| 635      | BISTA R, 2021, EARTH INTERACT               | 10.1175/EI-D-21-0006.1                      |
| 636      | SZOSTAK M, 2018, GEOD CARTOGR               | 10.24425/gac.2018.125476                    |
| 637      | LEE J, 2021, LAND USE POLICY                | 10.1016/j.landusepol.2021.105544            |
| 638      | PECO JD, 2021, SUSTAINABILITY-BASEL         | 10.3390/su13126555                          |
| 639      | JUAN JER, 2016, B ASOC GEOGR ESP            | 10.21138/bage.2272                          |
| 640      | TEREKHIN EA, 2017, COMPUT OPT               | 10.18287/2412-6179-2017-41-5-719-725        |
| 641      | OLSEN VM, 2021, NAT FOOD                    | 10.1038/s43016-021-00417-3                  |
| 642      | O'ROURKE E, 2019, EUR COUNTRYS              | 10.2478/euco-2019-0011                      |
| 643      | LI J, 2018, ENVIRON EARTH SCI               | 10.1007/s12665-018-7385-7                   |
| 644      | WANG R, 2020, SCI TOTAL ENVIRON             | 10.1016/j.scitotenv.2020.141416             |
| 645      | RUIZ-LENDINEZ JJ, 2020, ISPRS INT J GEO-INF | 10.3390/ijgi9040191                         |
| 646      | ARMOLAITIS K, 2011, ZEMDIRBYSTE             | NA                                          |
| 647      | DENG N, 2019, FRONT MICROBIOL               | 10.3389/fmicb.2019.00262                    |
| 648      | LAN JC, 2020, ECOL ENG                      | 10.1016/j.ecoleng.2020.106033               |
| 649      | OHASHI H, 2016, ECOL EVOL                   | 10.1002/ece3.2514                           |
| 650      | ZHANG LP, 2018, ISPRS INT J GEO-INF         | 10.3390/ijgi7080305                         |
| 651      | ZARAGOZI BM, 2011, SEARCH I SER DEV ATT     | 10.2495/ECO110321                           |
| 652      | ZHANG C, 2012, ADV MATER RES-SWITZ          | 10.4028/www.scientific.net/AMR.356-360.2422 |
| 653      | ASLAN A, 2021, SCI TOTAL ENVIRON            | 10.1016/j.scitotenv.2021.148320             |
| 654      | HAUCHHUM R, 2020, TROP ECOL                 | 10.1007/s42965-020-00079-5                  |
| 655      | CHAMBERS JC, 2014, INVAS PLANT SCI MANA     | 10.1614/IPSM-D-13-00046.1                   |
| 656      | PRAGYA N, 2017, GLOB ECOL CONSERV           | 10.1016/j.gecco.2017.06.002                 |
| 657      | YANG L, 2020, ECOL EVOL                     | 10.1002/ece3.6067                           |
| 658      | TOMUSIAK R, 2014, SYLWAN                    | NA                                          |
| 659      | BARDULIS A, 2012, RES RURAL DEV             | NA                                          |
| 660      | PISABARRO A, 2019, GEOGR ANN A              | 10.1080/04353676.2019.1591042               |
| 661      | MORELL-MONZO S, 2021, REMOTE SENS-BASEL     | 10.3390/rs13040681                          |



| Sequence | Paper                                                                                                   | DOI                             |
|----------|---------------------------------------------------------------------------------------------------------|---------------------------------|
| 662      | ZHANG SW, 2018, SCI REP-UK                                                                              | 10.1038/s41598-018-35624-9      |
| 663      | DAVIS JK, 2008, AFR J RANGE FOR SCI                                                                     | 10.2989/AJRF.2008.25.2.3.482    |
| 664      | FEDRIGOTTI C, 2016, GLOBAL NEST J                                                                       | NA                              |
| 665      | RYTTER RM, 2018, IFOREST                                                                                | 10.3832/for2853-011             |
| 666      | WOLINSKA A, 2020, AGRONOMY-BASEL                                                                        | 10.3390/agronomy10111795        |
| 667      | SHOYAMA K, 2021, ENVIRON MANAGE                                                                         | 10.1007/s00267-021-01497-4      |
| 668      | SAKELLARIOU M, 2021, LAND-BASEL                                                                         | 10.3390/land10050457            |
| 669      | LI H, 2021, LAND-BASEL                                                                                  | 10.3390/land10111206            |
| 670      | YOON H, 2020, ISPRS J PHOTOGRAMM                                                                        | 10.1016/j.isprsjprs.2020.05.021 |
| 671      | LI WJ, 2012, 2012 5TH INTERNATIONAL CONGRESS ON IMAGE<br>AND SIGNAL PROCESSING (CISP)                   | NA                              |
| 672      | CASTRO P, 2019, SPRINGER SER ENV MAN                                                                    | 10.1007/978-3-319-89644-1_6     |
| 673      | HANOUSKOVA I, 1999, PERSPECTIVES IN ECOLOGY: A GLANCE<br>FROM THE VII INTERNATIONAL CONGRESS OF ECOLOGY | NA                              |
| 674      | WANG SX, 2013, ADV INTEL SYS RES                                                                        | NA                              |
| 675      | DENG X, 2021, J LAND USE SCI                                                                            | 10.1080/1747423X.2021.1954707   |
| 676      | ESTOQUE RC, 2019, SCI TOTAL ENVIRON                                                                     | 10.1016/j.scitotenv.2019.07.204 |
| 677      | CZESAK B, 2021, REMOTE SENS-BASEL                                                                       | 10.3390/rs13061166              |
| 678      | LI YL, 2021, GEOGR SUSTAIN                                                                              | 10.1016/j.geosus.2021.06.003    |
| 679      | XIAO L, 2021, CATENA                                                                                    | 10.1016/j.catena.2020.105081    |
| 680      | KRYSIAK S, 2020, LAND-BASEL                                                                             | 10.3390/land9030082             |
| 681      | SULLIVAN B, 2016, TRANSPORT RES REC                                                                     | 10.3141/2580-09                 |
| 682      | LIU WC, 2020, J ARID LAND                                                                               | 10.1007/s40333-020-0009-6       |
| 683      | LASANTA T, 2021, CUAD INVESTIG GEOGR                                                                    | 10.18172/cig.4755               |
| 684      | ZAMPELLA RA, 2008, WETLANDS                                                                             | 10.1672/07-116.1                |
| 685      | DESYATKIN AR, 2018, ATMOSPHERE-BASEL                                                                    | 10.3390/atmos9080308            |
| 686      | TRAPPE J, 2017, J INSECT CONSERV                                                                        | 10.1007/s10841-017-0021-0       |
| 687      | ZITTI M, 2018, INT J ECOL DEV                                                                           | NA                              |
| 688      | LI DD, 2021, APPL SOIL ECOL                                                                             | 10.1016/j.apsoil.2020.103808    |
| 689      | HOU J, 2014, ENVIRON MONIT ASSESS                                                                       | 10.1007/s10661-013-3444-4       |
| 690      | KHORCHANI M, 2021, CATENA                                                                               | 10.1016/j.catena.2021.105374    |
| 691      | XYSTRAKIS F, 2014, ACTA BOT CROAT                                                                       | 10.2478/botcro-2013-0021        |
| 692      | LEE S, 2020, GISCI REMOTE SENS                                                                          | 10.1080/15481603.2019.1698490   |
| 693      | TAO MX, 2018, FRESEN ENVIRON BULL                                                                       | NA                              |
| 694      | NADAL-ROMERO E, 2021, CATENA                                                                            | 10.1016/j.catena.2021.105441    |
| 695      | ABADIE J, 2021, J VEG SCI                                                                               | 10.1111/jvs.12860               |
| 696      | KUZNETSOVA T, 2009, BALT FOR                                                                            | NA                              |
| 697      | SHI CD, 2018, ENRGY PROCED                                                                              | 10.1016/j.egypro.2018.10.041    |
| 698      | JIM CY, 1997, GEOGRAPHY                                                                                 | NA                              |
| 699      | AMADO TJC, 2020, BURL DODDS AGR SCI                                                                     | 10.19103/AS.2019.0049.14        |
| 700      | SHIRAZI MA, 1984, ENVIRON MANAGE                                                                        | 10.1007/BF01868027              |
| 701      | RUSSELL WB, 1985, CAN FIELD NAT                                                                         | NA                              |

| Sequence | Paper                                                                           | DOI                              |
|----------|---------------------------------------------------------------------------------|----------------------------------|
| 702      | CHIDI CL, 2017, SPRING GEOGR                                                    | 10.1007/978-981-10-2890-8_6      |
| 703      | TSUTSUMI M, 2012, GRASS FORAGE SCI                                              | 10.1111/j.1365-2494.2011.00819.x |
| 704      | SIMMONS SA, 2002, NORTHWEST SCI                                                 | NA                               |
| 705      | TSUTSUMI M, 2014, GRASSL SCI                                                    | 10.1111/grs.12054                |
| 706      | SASAKI K, 2021, LAND-BASEL                                                      | 10.3390/land10101031             |
| 707      | CHAUDHARY S, 2019, SUSTAINABILITY-BASEL                                         | 10.3390/su11246931               |
| 708      | PURGER JJ, 2011, AVIAN BIOL RES                                                 | 10.3184/175815511X13000366671256 |
| 709      | ZARAGOZI B, 2013, WIT TRANS ECOL ENVIR                                          | 10.2495/ECO130191                |
| 710      | SU GD, 2020, CHINESE GEOGR SCI                                                  | 10.1007/s11769-020-1146-8        |
| 711      | ZHANG C, 2012, SOIL SCI                                                         | 10.1097/SS.0b013e318270a637      |
| 712      | MALECKA M, 2014, SYLWAN                                                         | NA                               |
| 713      | RUSINA S, 2021, NEW FOREST                                                      | 10.1007/s11056-020-09809-y       |
| 714      | COJZER M, 2010, SUMAR LIST                                                      | NA                               |
| 715      | HU A, 2021, LAND DEGRAD DEV                                                     | 10.1002/ldr.3780                 |
| 716      | WEILER A, 2013, RESTOR ECOL                                                     | 10.1111/rec.12006                |
| 717      | WU MH, 2020, REMOTE SENS APPL                                                   | 10.1016/j.rsase.2020.100403      |
| 718      | LOUPASAKIS C, 2008, Q J ENG GEOL HYDROGE                                        | 10.1144/1470-9236/07-037         |
| 719      | WEI ZH, 2021, REMOTE SENS-BASEL                                                 | 10.3390/rs13132549               |
| 720      | YUN SW, 2020, J CHEM-NY                                                         | 10.1155/2020/9671871             |
| 721      | COSSART E, 2020, SUSTAINABILITY-BASEL                                           | 10.3390/su12114695               |
| 722      | TUMELIENE E, 2021, SUSTAINABILITY-BASEL                                         | 10.3390/su13126941               |
| 723      | WANG RJ, 2021, J ENVIRON MANAGE                                                 | 10.1016/j.jenvman.2021.112227    |
| 724      | KUKULS I, 2015, NORDIC VIEW TO SUSTAINABLE RURAL<br>DEVELOPMENT                 | NA                               |
| 725      | KIM KH, 1996, J ENVIRON SCI HEAL A                                              | 10.1080/10934529609376388        |
| 726      | SULIEMAN HM, 2014, AFR J ECOL                                                   | 10.1111/aje.12108                |
| 727      | AYE WM, 2020, PADDY WATER ENVIRON                                               | 10.1007/s10333-020-00791-x       |
| 728      | LOZADA JR, 2006, INTERCIENCIA                                                   | NA                               |
| 729      | CHANG J, 2015, LEGISLATION, TECHNOLOGY AND PRACTICE<br>OF MINE LAND RECLAMATION | NA                               |
| 730      | SREEDHAR Y, 2017, FRESN ENVIRON BULL                                            | NA                               |
| 731      | SCHMITZ MF, 2021, LAND-BASEL                                                    | 10.3390/land10070721             |
| 732      | CAO JJ, 2020, LAND USE POLICY                                                   | 10.1016/j.landusepol.2020.105027 |
| 733      | VIMIC AV, 2021, ATMOSPHERE-BASEL                                                | 10.3390/atmos12081054            |
| 734      | SULEVMANOV R, 2020, SPAN J SOIL SCI                                             | 10.3232/SJSS.2020.V10.N1.03      |
| 735      | JANUS J, 2021, ECOL INDIC                                                       | 10.1016/j.ecolind.2020.106904    |
| 736      | PALMERO-INIESTA M, 2021, LAND-BASEL                                             | 10.3390/land10080817             |
| 737      | TRIANTAFYLIDIS S, 2020, ENVIRON EARTH SCI                                       | 10.1007/s12665-020-09265-z       |
| 738      | TARNAWCZYK M, 2021, MINERALS-BASEL                                              | 10.3390/min11060559              |
| 739      | BOBROVSKY MV, 2018, KNE LIFE SCI                                                | 10.18502/cls.v4i7.3222           |
| 740      | NELSON M, 1990, LANDSCAPE URBAN PLAN                                            | 10.1016/0169-2046(90)90009-Q     |
| 741      | CALL CA, 1986, SOUTHWEST NAT                                                    | 10.2307/3671841                  |

| Sequence | Paper                                                                                                           | DOI                                        |
|----------|-----------------------------------------------------------------------------------------------------------------|--------------------------------------------|
| 742      | GISI U, 1981, ACTA OECOL-OEC PLANT                                                                              | NA                                         |
| 743      | GISI U, 1981, ACTA OECOL-OEC PLANT-a                                                                            | NA                                         |
| 744      | WIEGER A, 1982, GEOGR Z                                                                                         | NA                                         |
| 745      | BUCHA T, 2021, REMOTE SENS-BASEL                                                                                | 10.3390/rs13132488                         |
| 746      | LI YM, 2021, INT J ENV RES PUB HE                                                                               | 10.3390/ijerph18041815                     |
| 747      | NIE L, 2019, INT J SYST EVOL MICR                                                                               | 10.1099/ijsem.0.003578                     |
| 748      | PEREZ-LUQUE AJ, 2021, FORESTS                                                                                   | 10.3390/f12111584                          |
| 749      | SZATMARI D, 2018, INT CONF CARTOGR GIS                                                                          | NA                                         |
| 750      | SOYDAN H, 2015, INT GEOSCI REMOTE SE                                                                            | NA                                         |
| 751      | LAZDINS A, 2011, RURAL DEVELOPMENT                                                                              | NA                                         |
| 752      | WANG YW, 2020, ACTA GEOCHIM                                                                                     | 10.1007/s11631-019-00389-z                 |
| 753      | KHORCHANI M, 2021, HYDROL PROCESS                                                                               | 10.1002/hyp.14191                          |
| 754      | WANG YW, 2021, LAND-BASEL                                                                                       | 10.3390/land10121341                       |
| 755      | COJZER M, 2019, ACTA SILVAE LIGNI                                                                               | 10.20315/ASetL.119.3                       |
| 756      | KATAYAMA N, 2021, AGR ECOSYST ENVIRON                                                                           | 10.1016/j.agee.2021.107539                 |
| 757      | LIU J, 2012, ADV MATER RES-SWITZ                                                                                | 10.4028/www.scientific.net/AMR.356-360.726 |
| 758      | TROYAN J, 2019, ECONOMIES                                                                                       | 10.3390/economies7010003                   |
| 759      | ZHANG ZG, 2020, PEERJ                                                                                           | 10.7717/peerj.10349                        |
| 760      | OKSUZ DP, 2021, AGROFOREST SYST                                                                                 | 10.1007/s10457-021-00649-z                 |
| 761      | TAKAYAMA T, 2021, AUST J AGR RESOUR EC                                                                          | 10.1111/1467-8489.12425                    |
| 762      | STEPHENSON HG, 1996, CIM BULL                                                                                   | NA                                         |
| 763      | MOVAHEDI R, 2021, LAND USE POLICY                                                                               | 10.1016/j.landusepol.2021.105588           |
| 764      | DE BEURS KM, 2004, INT GEOSCI REMOTE SE                                                                         | NA                                         |
| 765      | RONG GH, 2021, AGR ECOSYST ENVIRON                                                                              | 10.1016/j.agee.2021.107505                 |
| 766      | DRAMSTAD WE, 2021, LAND-BASEL                                                                                   | 10.3390/land10111136                       |
| 767      | REGA C, 2020, CITIES NATURE                                                                                     | 10.1007/978-3-030-33027-9_5                |
| 768      | SEO J, 2020, ECON ENVIRON GEOL                                                                                  | 10.9719/EEG.2020.53.6.743                  |
| 769      | DELCROS P, 2005, REV GEOGR ALP                                                                                  | 10.3406/rga.2005.2358                      |
| 770      | SCORER C, 2019, S AFR GEOGR J                                                                                   | 10.1080/03736245.2018.1541018              |
| 771      | SARES MA, 2000, ICARD 2000, VOLS I AND II, PROCEEDINGS                                                          | NA                                         |
| 772      | TOBRATOV SA, 2019, AMAZON INVESTIG                                                                              | NA                                         |
| 773      | FRADETTE O, 2021, FOREST ECOL MANAG                                                                             | 10.1016/j.foreco.2021.119565               |
| 774      | SANTARSIERO V, 2021, LECT NOTES COMPUT SC                                                                       | 10.1007/978-3-030-86979-3_49               |
| 775      | SCOTT CA, 2001, BIOGEOCHEMISTRY-a                                                                               | 10.1023/A:1011840116540                    |
| 776      | CASERTA G, 2000, PERIOD BIOL                                                                                    | NA                                         |
| 777      | TEREKHIN EA, 2021, COMPUT OPT                                                                                   | 10.18287/2412-6179-CO-797                  |
| 778      | HOLDEN PB, 2021, LAND USE POLICY                                                                                | 10.1016/j.landusepol.2021.105429           |
| 779      | MIYAKE S, 2016, PAPERS OF THE 24TH EUROPEAN BIOMASS<br>CONFERENCE: SETTING THE COURSE FOR A BIOBASED<br>ECONOMY | NA                                         |
| 780      | MORENO-RODRIGUEZ V, 2020, J S AM EARTH SCI                                                                      | 10.1016/j.jsames.2020.102829               |
| 781      | WANG Y, 2016, SPRINGERPLUS                                                                                      | 10.1186/s40064-016-2678-3                  |

| Sequence | Paper                                                                                                                                                          | DOI                              |
|----------|----------------------------------------------------------------------------------------------------------------------------------------------------------------|----------------------------------|
| 782      | TANGHE M, 1984, B SOC ROY BOT BELG                                                                                                                             | NA                               |
| 783      | SCHUMAN GE, 1999, REMEDIATION AND MANAGEMENT OF<br>DEGRADED LANDS                                                                                              | NA                               |
| 784      | SCHREIBER KF, 1981, ANGEW BOT                                                                                                                                  | NA                               |
| 785      | TAN SK, 2004, MANAGEMENT SCIENCES AND GLOBAL<br>STRATEGIES IN THE 21ST CENTURY, VOLS 1 AND 2                                                                   | NA                               |
| 786      | LI GY, 2021, LAND-BASEL                                                                                                                                        | 10.3390/land10101049             |
| 787      | CHENG Q, 2013, ADV EDUC RES                                                                                                                                    | NA                               |
| 788      | BENISTON JW, 2017, ENCYCLOPEDIA OF SOIL SCIENCE, VOLS I-<br>III, 3RD EDITION                                                                                   | 10.1081/E-ESS3-120053535         |
| 789      | GRUIZ K, 2014, ENGINEERING TOOLS FOR ENVIRONMENTAL<br>RISK MANAGEMENT - I: ENVIRONMENTAL DETERIORATION<br>AND CONTAMINATION - PROBLEMS AND THEIR<br>MANAGEMENT | NA                               |
| 790      | YAMANAKA S, 2018, ECOL RES MONOGR                                                                                                                              | 10.1007/978-981-10-7203-1_15     |
| 791      | LIESKOVSKY J, 2021, LAND-BASEL                                                                                                                                 | 10.3390/land10040334             |
| 792      | KITANO S, 2021, LAND-BASEL                                                                                                                                     | 10.3390/land10060596             |
| 793      | YANG L, 2021, ZOOL STUD                                                                                                                                        | 10.6620/ZS.2021.60-72            |
| 794      | KITAZAWA M, 2021, BIODIVERS CONSERV                                                                                                                            | 10.1007/s10531-021-02178-8       |
| 795      | AFOLAYAN AJ, 1990, REV BIOL TROP                                                                                                                               | NA                               |
| 796      | SPIRA Y, 2014, ENGINEERING TOOLS FOR ENVIRONMENTAL<br>RISK MANAGEMENT - I: ENVIRONMENTAL DETERIORATION<br>AND CONTAMINATION - PROBLEMS AND THEIR<br>MANAGEMENT | NA                               |
| 797      | LIU QS, 2015, 2015 8TH INTERNATIONAL CONGRESS ON IMAGE<br>AND SIGNAL PROCESSING (CISP)                                                                         | NA                               |
| 798      | KOBAYASHI Y, 2018, ECOL RES MONOGR                                                                                                                             | 10.1007/978-981-10-7203-1_17     |
| 799      | MESCH M, 2001, BAT CONSERVATION AND MINING: A<br>TECHNICAL INTERACTIVE FORUM, PROCEEDINGS                                                                      | NA                               |
| 800      | CASTRO P, 2020, LAND USE POLICY                                                                                                                                | 10.1016/j.landusepol.2020.104633 |
| 801      | ZARAGOZI B, 2020, DATA BRIEF                                                                                                                                   | 10.1016/j.dib.2020.106340        |
| 802      | ZHAO LY, 2021, REMOTE SENS-BASEL                                                                                                                               | 10.3390/rs13204057               |
| 803      | ZHAO CZ, 2010, 2010 INTERNATIONAL CONFERENCE<br>AGRICULTURAL SCIENCES AND ENGINEERING (CASE 2010)                                                              | NA                               |
| 804      | SHEA P, 2000, ICARD 2000, VOLS I AND II, PROCEEDINGS                                                                                                           | NA                               |
| 805      | VOLKOVA I, 2020, J FOR SCI-PRAGUE                                                                                                                              | 10.17221/100/2020-JFS            |
| 806      | CHEN DL, 2021, SCI TOTAL ENVIRON                                                                                                                               | 10.1016/j.scitotenv.2021.148155  |
| 807      | SZATMARI D, 2021, CAN J REMOTE SENS                                                                                                                            | 10.1080/07038992.2021.1929118    |
| 808      | PURWAWANGSA H, 2021, J MANAJ HUTAN TROPIK                                                                                                                      | 10.7226/jtfm.27.te.32            |
| 809      | GAYLEY K, 2020, TAIWANIA                                                                                                                                       | 10.6165/tai.2020.65.336          |
| 810      | NIZKIY S, 2020, E3S WEB CONF                                                                                                                                   | 10.1051/e3sconf/202020302005     |

| Sequence | Paper                                                                                                                                             | DOI                                         |
|----------|---------------------------------------------------------------------------------------------------------------------------------------------------|---------------------------------------------|
| 811      | ZHU QW, 2017, LAND RECLAMATION IN ECOLOGICAL FRAGILE AREAS                                                                                        | NA                                          |
| 812      | AHMED A, 2021, LAND USE POLICY                                                                                                                    | 10.1016/j.landusepol.2021.105492            |
| 813      | LEE H, 2020, ECON ENVIRON GEOL                                                                                                                    | 10.9719/EEG.2020.53.2.133                   |
| 814      | KARMINI, 2020, FOR SOC                                                                                                                            | 10.24259/fs.v4i1.8939                       |
| 815      | GALLAGHER D, 1999, ENVIRONMENTAL ENGINEERING 1999                                                                                                 | NA                                          |
| 816      | FUJII Y, 2021, INT J HOUS MARK ANAL                                                                                                               | 10.1108/IJHMA-05-2020-0054                  |
| 817      | TAN Y, 2014, APPL MECH MATER                                                                                                                      | 10.4028/www.scientific.net/AMM.448-453.923  |
| 818      | ZHANG LP, 2017, LAND RECLAMATION IN ECOLOGICAL FRAGILE AREAS                                                                                      | NA                                          |
| 819      | MATSUSHIMA N, 2021, OECOLOGIA                                                                                                                     | 10.1007/s00442-021-04991-y                  |
| 820      | REBOLA LC, 2021, SCI TOTAL ENVIRON                                                                                                                | 10.1016/j.scitotenv.2021.149487             |
| 821      | COGLIASTRO A, 2019, FOREST CHRON                                                                                                                  | 10.5558/tfc2019-014                         |
| 822      | PANG W, 2019, APPL ECOL ENV RES                                                                                                                   | 10.15666/aeer/1702_22332247                 |
| 823      | GAUDESIS R, 2017, ENVIRON ENG-VILNIUS                                                                                                             | 10.3846/enviro.2017.190                     |
| 824      | WANG LD, 2021, J ENVIRON PROT ECOL                                                                                                                | NA                                          |
| 825      | ZHANG JF, 2020, STUDY OF ECOLOGICAL ENGINEERING OF HUMAN SETTLEMENTS                                                                              | 10.1007/978-981-15-1373-2_6                 |
| 826      | SMITH BD, 2000, ICARD 2000, VOLS I AND II, PROCEEDINGS                                                                                            | NA                                          |
| 827      | SCIUBBA L, 2021, AGRONOMY-BASEL                                                                                                                   | 10.3390/agronomy11091841                    |
| 828      | GU MH, 2021, FRONT ENV SCI-SWITZ                                                                                                                  | 10.3389/fenvs.2021.580775                   |
| 829      | QUIJADA LVC, 2021, HIST AGRAR                                                                                                                     | 10.26882/histagrar.083e01C                  |
| 830      | LEIVA CL, 2020, DOC ANAL GEOGR                                                                                                                    | 10.5565/rev/dag.621                         |
| 831      | SZYMANIUK Z, 2018, PROCEEDINGS OF THE 2018 INTERNATIONAL SCIENTIFIC CONFERENCE - ECONOMIC SCIENCES FOR AGRIBUSINESS AND RURAL ECONOMY, NO 2, 2018 | 10.22630/ESARE.2018.2.11                    |
| 832      | ESTEVEZ E, 2021, FRONT WATER                                                                                                                      | 10.3389/frwa.2021.682608                    |
| 833      | CRAMER AS, 2021, MINERALS-BASEL                                                                                                                   | 10.3390/min11040365                         |
| 834      | LI XD, 2017, LAND RECLAMATION IN ECOLOGICAL FRAGILE AREAS                                                                                         | NA                                          |
| 835      | BAEVA YI, 2019, SPRING GEOGR                                                                                                                      | 10.1007/978-3-319-89602-1_12                |
| 836      | KIRKBY M, 2005, IAHS-AISH P                                                                                                                       | NA                                          |
| 837      | SKOKANOVA H, 2016, CENTRAL EUROPE AREA IN VIEW OF CURRENT GEOGRAPHY                                                                               | NA                                          |
| 838      | DIAO HJ, 2021, J PLANT ECOL                                                                                                                       | 10.1093/jpe/rtab006                         |
| 839      | FRAIDE EMC, 2018, ESTUD DERECHO                                                                                                                   | 10.17533/udea.esde.v75n166a04               |
| 840      | XU DY, 2013, ADV MATER RES-SWITZ                                                                                                                  | 10.4028/www.scientific.net/AMR.726-731.4976 |
| 841      | BALAMI S, 2021, FOREST ECOL MANAG                                                                                                                 | 10.1016/j.foreco.2021.119181                |
| 842      | GAO X, 2021, PLOS ONE                                                                                                                             | 10.1371/journal.pone.0255509                |

| Sequence | Paper                                                                                            | DOI                                        |
|----------|--------------------------------------------------------------------------------------------------|--------------------------------------------|
|          | SARES MA, 1996, PROCEEDINGS OF THE SYMPOSIUM ON THE                                              |                                            |
| 843      | APPLICATION OF GEOPHYSICS TO ENGINEERING AND<br>ENVIRONMENTAL PROBLEMS                           | NA                                         |
| 844      | HE MX, 2014, APPL MECH MATER                                                                     | 10.4028/www.scientific.net/AMM.448-453.978 |
| 845      | ZHANG FH, 2007, PRINCIPLES AND PRACTICES OF<br>DESERTIFICATION CONTROL, VOL I                    | NA                                         |
| 846      | KOLODNY O, 2016, J CONCHOL                                                                       | NA                                         |
| 847      | KARA F, 2021, ENVIRON MONIT ASSESS                                                               | 10.1007/s10661-021-09403-5                 |
| 848      | CRAVOTTA CA, 2017, ENVIRON ENG GEOSCI                                                            | 10.2113/gseegeosci.23.4.243                |
|          | KOURKOUMPAS DS, 2018, PAPERS OF THE 26TH EUROPEAN                                                |                                            |
| 849      | BIOMASS CONFERENCE: SETTING THE COURSE FOR A<br>BIOBASED ECONOMY                                 | NA                                         |
| 850      | KAKEMBO V, 2019, CLIM CHANG MANAG                                                                | 10.1007/978-3-030-12974-3_14               |
| 851      | GUO FX, 2021, FORESTS                                                                            | 10.3390/f12091228                          |
| 852      | ABELLA SR, 2021, APPL VEG SCI                                                                    | 10.1111/avsc.12629                         |
| 853      | HE S, 2021, REMOTE SENS-BASEL                                                                    | 10.3390/rs13193956                         |
| 854      | ZHUANG CL, 2005, LECT NOTES ARTIF INT                                                            | NA                                         |
|          | DOLNEY TJ, 2013, EMERGING METHODS AND                                                            |                                            |
| 855      | MULTIDISCIPLINARY APPLICATIONS IN GEOSPATIAL<br>RESEARCH                                         | 10.4018/978-1-4666-1951-7.ch010            |
|          | DOLNEY TJ, 2013, GEOGRAPHIC INFORMATION SYSTEMS:                                                 |                                            |
| 856      | CONCEPTS, METHODOLOGIES, TOOLS, AND APPLICATIONS,<br>VOL 1                                       | 10.4018/978-1-4666-2038-4.ch126            |
| 857      | SALAMON JA, 2020, ECOL EVOL                                                                      | 10.1002/ece3.6535                          |
| 858      | CHAMID C, 2020, IOP CONF SER-MAT SCI                                                             | 10.1088/1757-899X/830/3/032070             |
| 859      | ALAOUI ML, 2005, ACTA BOT GALLICA                                                                | 10.1080/12538078.2005.10515506             |
| 860      | GARTSHORE H, 2019, LABOUR HIST-AUST                                                              | 10.3828/jlh.2019.21                        |
| 861      | GAWEDA T, 2021, FORESTS                                                                          | 10.3390/f12070956                          |
|          | SULIEMAN HM, 2007, 2007 INTERNATIONAL WORKSHOP ON                                                |                                            |
| 862      | THE ANALYSIS OF MULTI-TEMPORAL REMOTE SENSING<br>IMAGES                                          | NA                                         |
| 863      | YANG F, 2021, ARCH AGRON SOIL SCI                                                                | 10.1080/03650340.2020.1820487              |
| 864      | NORDEN B, 2021, FOREST ECOL MANAG                                                                | 10.1016/j.foreco.2021.119045               |
| 865      | MAKTAV D, 1996, EARTH OBS REMOT SEN+                                                             | NA                                         |
| 866      | SHI CD, 2019, IOP C SER EARTH ENV                                                                | 10.1088/1755-1315/267/6/062006             |
| 867      | NABYTOVYC I, 2021, KJNIZEV SMOTRA                                                                | NA                                         |
| 868      | MICHAELS PJ, 1985, CLIMATIC CHANGE                                                               | 10.1007/BF00140505                         |
| 869      | MATHISEN E, 2018, CIV WAR AM                                                                     | NA                                         |
| 870      | HOLMBERG GV, 1980, T ASAE                                                                        | NA                                         |
| 871      | RICHMOND TC, 1995, SUDBURY '95 - MINING AND THE<br>ENVIRONMENT, CONFERENCE PROCEEDINGS, VOLS 1-3 | NA                                         |
| 872      | ROBLIN KE, 2007, OIL GAS J                                                                       | NA                                         |

| Sequence | Paper                                                                                                          | DOI                                   |
|----------|----------------------------------------------------------------------------------------------------------------|---------------------------------------|
| 873      | TAN YR, 1990, SOIL CROP SCI SOC FL                                                                             | NA                                    |
| 874      | WORKMAN JL, 1991, PROCEEDINGS OF THE SEVENTEENTH ANNUAL CONFERENCE ON EXPLOSIVES AND BLASTING TECHNIQUE, VOL 2 | NA                                    |
| 875      | ROBINSON NA, 1990, PROCEEDINGS OF THE 1990 MINING AND RECLAMATION CONFERENCE AND EXHIBITION, VOLS 1 AND 2      | NA                                    |
| 876      | DATTAVIO LE, 1980, J ENVIRON QUAL                                                                              | 10.2134/jeq1980.00472425000900040014x |
| 877      | ZAUSKOVA L, 2013, HIST CASOPIS                                                                                 | NA                                    |
| 878      | COMBE MM, 2018, EDINB LAW REV                                                                                  | 10.3366/elr.2018.0490                 |
| 879      | BORGER I, 1999, ARCHIT DIGEST                                                                                  | NA                                    |
| 880      | CALDWELL C, 1992, ACHIEVING LAND USE POTENTIAL THROUGH RECLAMATION                                             | NA                                    |
| 881      | CURULLI I, 2007, PLACES-FORUM ENVIRON                                                                          | NA                                    |
| 882      | HUTCHINGS MJ, 1989, BRIGHTON CROP PROTECTION CONFERENCE - WEEDS 1989, VOLS 1-3                                 | NA                                    |
| 883      | ASTON RL, 2001, MINER RESOUR ENG                                                                               | NA                                    |
| 884      | IANNACCHIONE AT, 1995, ROCK MECHANICS - PROCEEDINGS OF THE 35TH U.S. SYMPOSIUM                                 | NA                                    |
| 885      | DARRACQ S, 1995, LANDSCAPE ECOLOGY IN LAND USE PLANNING METHODS AND PRACTICE                                   | NA                                    |
| 886      | HUTNIK RJ, 1990, PROCEEDINGS OF THE 1990 MINING AND RECLAMATION CONFERENCE AND EXHIBITION, VOLS 1 AND 2        | NA                                    |
| 887      | SANTOPIETRO GD, 1996, J SOIL WATER CONSERV                                                                     | NA                                    |
| 888      | RUSSELL LJ, 1990, PROCEEDINGS OF THE FOURTH WESTERN REGIONAL CONFERENCE ON PRECIOUS METALS AND THE ENVIRONMENT | NA                                    |
| 889      | SOPPER WE, 1990, PROCEEDINGS OF THE 1990 MINING AND RECLAMATION CONFERENCE AND EXHIBITION, VOLS 1 AND 2        | NA                                    |
| 890      | RUSO RO, 1995, NITR FIX TREE RES                                                                               | NA                                    |
| 891      | MICHAUD LH, 1995, SUDBURY '95 - MINING AND THE ENVIRONMENT, CONFERENCE PROCEEDINGS, VOLS 1-3                   | NA                                    |
| 892      | MESCH M, 2001, BAT CONSERVATION AND MINING: A TECHNICAL INTERACTIVE FORUM, PROCEEDINGS-a                       | NA                                    |
| 893      | OHARA KC, 1992, PROCEEDINGS OF THE 43RD ANNUAL HIGHWAY GEOLOGY SYMPOSIUM                                       | NA                                    |
| 894      | STANDFIELD R, 2012, EMPIRE PERSPECT                                                                            | 10.5937/rudrad1201061S                |
| 895      | ZIPPER CE, 1992, ACHIEVING LAND USE POTENTIAL THROUGH RECLAMATION                                              | NA                                    |
| 896      | ROBBIE J, 2021, EDINB LAW REV                                                                                  | 10.3366/elr.2021.0716                 |

**Supplementary Table S2 Most Global Cited Documents 100 (theme)**

| Paper                                    | DOI                              | Total Citations | Main research | Appears as a marginal study (appears as a sub study of other studies, or is only mentioned) | The study was not mentioned (the study on abandonment of farmland was not carried out) |
|------------------------------------------|----------------------------------|-----------------|---------------|---------------------------------------------------------------------------------------------|----------------------------------------------------------------------------------------|
| FARGIONE J, 2008, SCIENCE                | 10.1126/science.1152747          | 2450            |               | √                                                                                           |                                                                                        |
| MACDONALD D, 2000, J ENVIRON MANAGE      | 10.1006/jema.1999.0335           | 1285            | √             |                                                                                             |                                                                                        |
| RAMANKUTTY N, 1999, GLOBAL BIOGEOCHEM CY | 10.1029/1999GB900046             | 1281            |               | √                                                                                           |                                                                                        |
| HOBBS RJ, 2006, GLOBAL ECOL BIOGEOGR     | 10.1111/j.1466-822x.2006.00212.x | 1184            |               |                                                                                             | √                                                                                      |
| PONTIUS RG, 2011, INT J REMOTE SENS      | 10.1080/01431161.2011.552923     | 1058            |               |                                                                                             | √                                                                                      |
| VONUExKULL HR, 1995, PLANT SOIL          | 10.1007/BF00009558               | 998             |               |                                                                                             | √                                                                                      |
| SCHIMEL DS, 2001, NATURE                 | 10.1038/35102500                 | 895             |               | √                                                                                           |                                                                                        |
| LAMB D, 2005, SCIENCE                    | 10.1126/science.1111773          | 841             |               |                                                                                             | √                                                                                      |
| STOATE C, 2001, J ENVIRON MANAGE         | 10.1006/jema.2001.0473           | 811             |               | √                                                                                           |                                                                                        |
| GUARIGUATA MR, 2001, FOREST ECOL MANAG   | 10.1016/S0378-1127(00)00535-1    | 809             |               |                                                                                             | √                                                                                      |
| STOATE C, 2009, J ENVIRON MANAGE         | 10.1016/j.jenvman.2009.07.005    | 782             |               | √                                                                                           |                                                                                        |
| HOUGHTON RA, 1999, SCIENCE               | 10.1126/science.285.5427.574     | 750             |               | √                                                                                           |                                                                                        |



| Paper                                        | DOI                              | Total Citations | Main research | Appears as a marginal study (appears as a sub study of other studies, or is only mentioned) | The study was not mentioned (the study on abandonment of farmland was not carried out) |
|----------------------------------------------|----------------------------------|-----------------|---------------|---------------------------------------------------------------------------------------------|----------------------------------------------------------------------------------------|
| KEESSTRA SD,<br>2016, SOIL-GERMANY           | 10.5194/soil-2-111-2016          | 675             |               |                                                                                             | √                                                                                      |
| BAKKER JP, 1999,<br>TRENDS ECOL<br>EVOL      | 10.1016/S0169-5347(98)01544-4    | 639             |               |                                                                                             | √                                                                                      |
| CHAZDON RL,<br>2003, PERSPECT<br>PLANT ECOL  | 10.1078/1433-8319-00042          | 635             |               |                                                                                             | √                                                                                      |
| GOODALE CL, 2002,<br>ECOL APPL               | 10.2307/3060997                  | 595             |               |                                                                                             | √                                                                                      |
| WEISS H, 1993,<br>SCIENCE                    | 10.1126/science.261.5124.995     | 573             |               |                                                                                             | √                                                                                      |
| MCGUIRE AD, 2001,<br>GLOBAL<br>BIOGEOCHEM CY | 10.1029/2000GB001298             | 563             |               | √                                                                                           |                                                                                        |
| GARCIA-RUIZ JM,<br>2011, EARTH-SCI<br>REV    | 10.1016/j.earscirev.2011.01.006  | 551             |               | √                                                                                           |                                                                                        |
| PAILLET Y, 2010,<br>CONSERV BIOL             | 10.1111/j.1523-1739.2009.01399.x | 547             |               |                                                                                             | √                                                                                      |
| LAURANCE WF,<br>2011, BIOL<br>CONSERV        | 10.1016/j.biocon.2010.09.021     | 542             |               |                                                                                             | √                                                                                      |
| BROWN DG, 2005,<br>ECOL APPL                 | 10.1890/03-5220                  | 534             |               | √                                                                                           |                                                                                        |
| CRAMER VA, 2008,<br>TRENDS ECOL<br>EVOL      | 10.1016/j.tree.2007.10.005       | 528             | √             |                                                                                             |                                                                                        |
| KRAUSS J, 2010,<br>ECOL LETT                 | 10.1111/j.1461-0248.2010.01457.x | 505             |               | √                                                                                           |                                                                                        |
| HOUGHTON RA,<br>2000, NATURE                 | 10.1038/35002062                 | 499             |               | √                                                                                           |                                                                                        |

| Paper                                    | DOI                                                 | Total Citations | Main research | Appears as a marginal study (appears as a sub study of other studies, or is only mentioned) | The study was not mentioned (the study on abandonment of farmland was not carried out) |
|------------------------------------------|-----------------------------------------------------|-----------------|---------------|---------------------------------------------------------------------------------------------|----------------------------------------------------------------------------------------|
| STEHFEST E, 2009,<br>CLIMATIC<br>CHANGE  | 10.1007/s10584-008-9534-6                           | 490             |               |                                                                                             | √                                                                                      |
| MOREIRA F, 2011, J<br>ENVIRON<br>MANAGE  | 10.1016/j.jenvman.2011.06.028                       | 488             |               |                                                                                             | √                                                                                      |
| DUPOUEY JL, 2002,<br>ECOLOGY             | 10.1890/0012-<br>9658(2002)083[2978:IIOPLU]2.0.CO;2 | 487             | √             |                                                                                             |                                                                                        |
| FIELD CB, 2008,<br>TRENDS ECOL<br>EVOL   | 10.1016/j.tree.2007.12.001                          | 465             |               | √                                                                                           |                                                                                        |
| FOSTER DR, 1992, J<br>ECOL               | 10.2307/2260864                                     | 452             |               |                                                                                             | √                                                                                      |
| POSCHLOD P, 2002,<br>BIOL CONSERV        | 10.1016/S0006-3207(01)00201-4                       | 452             |               |                                                                                             | √                                                                                      |
| VERBURG PH, 2009,<br>LANDSCAPE ECOL      | 10.1007/s10980-009-9355-7                           | 448             | √             |                                                                                             |                                                                                        |
| FUKAMI T, 2005,<br>ECOL LETT             | 10.1111/j.1461-0248.2005.00829.x                    | 448             |               | √                                                                                           |                                                                                        |
| GARCIA-RUIZ JM,<br>2010, CATENA          | 10.1016/j.catena.2010.01.001                        | 435             |               | √                                                                                           |                                                                                        |
| QADIR M, 2014,<br>NAT RESOUR<br>FORUM    | 10.1111/1477-8947.12054                             | 432             |               |                                                                                             | √                                                                                      |
| GEHRIG-FASEL J,<br>2007, J VEG SCI       | 10.1658/1100-<br>9233(2007)18[571:TLSITS]2.0.CO;2   | 431             |               |                                                                                             | √                                                                                      |
| SCHIMEL D, 2000,<br>SCIENCE              | 10.1126/science.287.5460.2004                       | 430             |               | √                                                                                           |                                                                                        |
| SCHEIDEGGER Y,<br>2000, OECOLOGIA        | 10.1007/s004420000466                               | 428             |               |                                                                                             | √                                                                                      |
| HENLE K, 2008,<br>AGR ECOSYST<br>ENVIRON | 10.1016/j.agee.2007.09.005                          | 420             |               | √                                                                                           |                                                                                        |

| Paper                                                                    | DOI                              | Total Citations | Main research | Appears as a marginal study (appears as a sub study of other studies, or is only mentioned) | The study was not mentioned (the study on abandonment of farmland was not carried out) |
|--------------------------------------------------------------------------|----------------------------------|-----------------|---------------|---------------------------------------------------------------------------------------------|----------------------------------------------------------------------------------------|
| CAMPBELL JE, 2008, ENVIRON SCI TECHNOL                                   | 10.1021/es800052w                | 417             | √             |                                                                                             |                                                                                        |
| KOWALCHUK GA, 2002, ANTON LEEUW INT J G SHAKESBY RA, 2011, EARTH-SCI REV | 10.1023/A:1020565523615          | 405             |               |                                                                                             | √                                                                                      |
| SERRA P, 2008, APPL GEOGR                                                | 10.1016/j.earscirev.2011.01.001  | 395             |               | √                                                                                           |                                                                                        |
| NAVARRO LM, 2012, ECOSYSTEMS                                             | 10.1016/j.apgeog.2008.02.001     | 394             |               | √                                                                                           |                                                                                        |
| SCHILLING J, 2008, J AM PLANN ASSOC                                      | 10.1007/s10021-012-9558-7        | 384             | √             |                                                                                             |                                                                                        |
| HOLL KD, 2000, RESTOR ECOL                                               | 10.1080/01944360802354956        | 384             |               |                                                                                             | √                                                                                      |
| AIDE TM, 2000, RESTOR ECOL                                               | 10.1046/j.1526-100x.2000.80049.x | 382             |               |                                                                                             | √                                                                                      |
| CHAZDON RL, 2007, PHILOS T R SOC B                                       | 10.1046/j.1526-100x.2000.80048.x | 374             |               |                                                                                             | √                                                                                      |
| FINEGAN B, 1996, TRENDS ECOL EVOL                                        | 10.1098/rstb.2006.1990           | 372             |               | √                                                                                           |                                                                                        |
| TSCHARNTKE T, 2011, J APPL ECOL                                          | 10.1016/0169-5347(96)81090-1     | 372             |               | √                                                                                           |                                                                                        |
| ROUNSEVELL MDA, 2006, AGR ECOSYST ENVIRON                                | 10.1111/j.1365-2664.2010.01939.x | 371             |               |                                                                                             | √                                                                                      |
|                                                                          | 10.1016/j.agee.2005.11.027       | 370             |               | √                                                                                           |                                                                                        |

| Paper                                  | DOI                                             | Total Citations | Main research | Appears as a marginal study (appears as a sub study of other studies, or is only mentioned) | The study was not mentioned (the study on abandonment of farmland was not carried out) |
|----------------------------------------|-------------------------------------------------|-----------------|---------------|---------------------------------------------------------------------------------------------|----------------------------------------------------------------------------------------|
| MEYFROIDT P, 2011, ANNU REV ENV RESOUR | 10.1146/annurev-environ-090710-143732           | 363             |               |                                                                                             | √                                                                                      |
| BIGNAL EM, 1996, J APPL ECOL           | 10.2307/2404973                                 | 361             |               |                                                                                             | √                                                                                      |
| RUDEL TK, 2009, P NATL ACAD SCI USA    | 10.1073/pnas.0812540106                         | 357             |               | √                                                                                           |                                                                                        |
| HURTT GC, 2006, GLOBAL CHANGE BIOL     | 10.1111/j.1365-2486.2006.01150.x                | 352             |               | √                                                                                           |                                                                                        |
| SILVER WL, 2000, RESTOR ECOL           | 10.1046/j.1526-100x.2000.80054.x                | 345             |               | √                                                                                           |                                                                                        |
| MOTTET A, 2006, AGR ECOSYST ENVIRON    | 10.1016/j.agee.2005.11.017                      | 344             |               |                                                                                             | √                                                                                      |
| FLINN KM, 2005, FRONT ECOL ENVIRON     | 10.1890/1540-9295(2005)003[0243:ROFPCI]2.0.CO;2 | 343             |               | √                                                                                           |                                                                                        |
| GELLRICH M, 2007, AGR ECOSYST ENVIRON  | 10.1016/j.agee.2006.05.001                      | 342             | √             |                                                                                             |                                                                                        |
| KAPLAN JO, 2011, HOLOCENE              | 10.1177/0959683610386983                        | 341             |               |                                                                                             | √                                                                                      |
| VERBURG PH, 2009, J ENVIRON MANAGE     | 10.1016/j.jenvman.2008.08.005                   | 331             |               |                                                                                             | √                                                                                      |
| FISCHER M, 1997, CONSERV BIOL          | 10.1046/j.1523-1739.1997.96082.x                | 327             |               |                                                                                             | √                                                                                      |
| MATHER AS, 1998, AREA                  | 10.1111/j.1475-4762.1998.tb00055.x              | 326             |               | √                                                                                           |                                                                                        |
| ROSELL F, 2005, MAMMAL REV             | 10.1111/j.1365-2907.2005.00067.x                | 320             |               |                                                                                             | √                                                                                      |

| Paper                                     | DOI                                             | Total Citations | Main research | Appears as a marginal study (appears as a sub study of other studies, or is only mentioned) | The study was not mentioned (the study on abandonment of farmland was not carried out) |
|-------------------------------------------|-------------------------------------------------|-----------------|---------------|---------------------------------------------------------------------------------------------|----------------------------------------------------------------------------------------|
| SOARES BS, 2002, ECOL MODEL               | 10.1016/S0304-3800(02)00059-5                   | 319             |               | √                                                                                           |                                                                                        |
| WHEELER BD, 2000, J ECOL                  | 10.1046/j.1365-2745.2000.00455.x                | 312             |               |                                                                                             | √                                                                                      |
| DAVIDSON EA, 2007, NATURE                 | 10.1038/nature05900                             | 310             |               | √                                                                                           |                                                                                        |
| TASSER E, 2007, AGR ECOSYST ENVIRON       | 10.1016/j.agee.2006.05.004                      | 309             | √             |                                                                                             |                                                                                        |
| DENGLER J, 2014, AGR ECOSYST ENVIRON      | 10.1016/j.agee.2013.12.015                      | 308             |               |                                                                                             | √                                                                                      |
| LIM HS, 2008, J GEOCHEM EXPLOR            | 10.1016/j.gexplo.2007.04.008                    | 307             |               |                                                                                             | √                                                                                      |
| TASSER E, 2002, APPL VEG SCI              | 10.1658/1402-2001(2002)005[0173:IOLUCO]2.0.CO;2 | 306             |               |                                                                                             | √                                                                                      |
| STOFFLER D, 2001, SPACE SCI REV           | 10.1023/A:1011937020193                         | 305             |               |                                                                                             | √                                                                                      |
| DIRNBOCK T, 2003, J BIOGEOGR              | 10.1046/j.1365-2699.2003.00839.x                | 300             |               |                                                                                             | √                                                                                      |
| VAN VLIET J, 2015, LANDSCAPE URBAN PLAN   | 10.1016/j.landurbplan.2014.09.001               | 296             |               | √                                                                                           |                                                                                        |
| PIMENTEL D, 1998, ECOSYSTEMS              | 10.1007/s100219900035                           | 292             |               | √                                                                                           |                                                                                        |
| CHAZDON RL, 2016, SCI ADV                 | 10.1126/sciadv.1501639                          | 292             |               |                                                                                             | √                                                                                      |
| GARCIA-RUIZ JM, 2011, AGR ECOSYST ENVIRON | 10.1016/j.agee.2011.01.003                      | 287             | √             |                                                                                             |                                                                                        |
| STRIJCKER D, 2005, BASIC APPL ECOL        | 10.1016/j.baae.2005.01.001                      | 286             |               | √                                                                                           |                                                                                        |

| Paper                                        | DOI                              | Total Citations | Main research | Appears as a marginal study (appears as a sub study of other studies, or is only mentioned) | The study was not mentioned (the study on abandonment of farmland was not carried out) |
|----------------------------------------------|----------------------------------|-----------------|---------------|---------------------------------------------------------------------------------------------|----------------------------------------------------------------------------------------|
| BAUMANN M, 2011,<br>LAND USE POLICY          | 10.1016/j.landusepol.2010.11.003 | 285             | √             |                                                                                             |                                                                                        |
| HOOGWIJK M,<br>2005, BIOMASS                 | 10.1016/j.biombioe.2005.05.002   | 282             |               | √                                                                                           |                                                                                        |
| BIOENERG                                     |                                  |                 |               |                                                                                             |                                                                                        |
| VIEIRA DLM, 2006,<br>RESTOR ECOL             | 10.1111/j.1526-100X.2006.00100.x | 281             |               |                                                                                             | √                                                                                      |
| MORRIEN E, 2017,<br>NAT COMMUN               | 10.1038/ncomms14349              | 276             |               | √                                                                                           |                                                                                        |
| RICE RA, 2000,<br>AMBIO                      | 10.1579/0044-7447-29.3.167       | 275             |               |                                                                                             | √                                                                                      |
| NEPSTAD DC, 2002,<br>J GEOPHYS RES-<br>ATMOS | 10.1029/2001JD000360             | 274             |               |                                                                                             | √                                                                                      |
| GIBBS HK, 2015,<br>APPL GEOGR                | 10.1016/j.apgeog.2014.11.024     | 273             |               | √                                                                                           |                                                                                        |
| HERMY M, 2007,<br>ECOL RES                   | 10.1007/s11284-007-0354-3        | 273             |               | √                                                                                           |                                                                                        |
| CAI XM, 2011,<br>ENVIRON SCI<br>TECHNOL      | 10.1021/es103338e                | 272             |               | √                                                                                           |                                                                                        |
| JANGID K, 2011,<br>SOIL BIOL<br>BIOCHEM      | 10.1016/j.soilbio.2011.06.022    | 272             |               |                                                                                             | √                                                                                      |
| FUKAMI T, 2005, P<br>ROY SOC B-BIOL<br>SCI   | 10.1098/rspb.2005.3277           | 270             |               | √                                                                                           |                                                                                        |
| MIAO YX, 2011,<br>AGRON SUSTAIN<br>DEV       | 10.1051/agro/2010034             | 270             |               |                                                                                             | √                                                                                      |
| KARDOL P, 2010,<br>TRENDS ECOL<br>EVOL       | 10.1016/j.tree.2010.09.001       | 267             |               | √                                                                                           |                                                                                        |

| Paper                                                                                                                | DOI                              | Total Citations | Main research | Appears as a marginal study (appears as a sub study of other studies, or is only mentioned) | The study was not mentioned (the study on abandonment of farmland was not carried out) |
|----------------------------------------------------------------------------------------------------------------------|----------------------------------|-----------------|---------------|---------------------------------------------------------------------------------------------|----------------------------------------------------------------------------------------|
| LASANTA-<br>MARTINEZ T, 2005,<br>APPL GEOGR<br>AIDE TM, 1995,<br>FOREST ECOL<br>MANAG                                | 10.1016/j.apgeog.2004.11.001     | 266             |               | √                                                                                           |                                                                                        |
| MAYAUX P, 2005,<br>PHILOS T R SOC B<br>DRUMMOND MA,<br>2010, BIOSCIENCE<br>QUEIROZ C, 2014,<br>FRONT ECOL<br>ENVIRON | 10.1016/0378-1127(95)03576-V     | 264             |               |                                                                                             | √                                                                                      |
| DOTTERWEICH M,<br>2008,<br>GEOMORPHOLOGY<br>BUCKLEY DH,<br>2001, MICROB<br>ECOL                                      | 10.1098/rstb.2004.1590           | 264             |               |                                                                                             | √                                                                                      |
| RENWICK A, 2013,<br>LAND USE POLICY<br>WILSON JD, 1997, J<br>APPL ECOL                                               | 10.1525/bio.2010.60.4.7          | 263             |               | √                                                                                           |                                                                                        |
|                                                                                                                      | 10.1890/120348                   | 261             | √             |                                                                                             |                                                                                        |
|                                                                                                                      | 10.1016/j.geomorph.2008.05.023   | 261             |               | √                                                                                           |                                                                                        |
|                                                                                                                      | 10.1007/s002480000108            | 259             |               | √                                                                                           |                                                                                        |
|                                                                                                                      | 10.1016/j.landusepol.2012.04.005 | 256             | √             |                                                                                             |                                                                                        |
|                                                                                                                      | 10.2307/2405262                  | 254             |               |                                                                                             | √                                                                                      |

**Supplementary Table S3 Most Global Cited Documents 100 (title)**

| Paper                                     | DOI                                           | Total Citations | Main research | Appears as a marginal study (appears as a sub study of other studies, or is only mentioned) | The study was not mentioned (the study on abandonment of farmland was not carried out) |
|-------------------------------------------|-----------------------------------------------|-----------------|---------------|---------------------------------------------------------------------------------------------|----------------------------------------------------------------------------------------|
|                                           |                                               |                 |               |                                                                                             |                                                                                        |
| CRAMER VA, 2008, TRENDS ECOL EVOL         | 10.1016/j.tree.2007.10.005                    | 531             | √             |                                                                                             |                                                                                        |
| VERBURG PH, 2009, LANDSCAPE ECOL          | 10.1007/s10980-009-9355-7                     | 449             | √             |                                                                                             |                                                                                        |
| GEHRIG-FASEL J, 2007, J VEG SCI           | 10.1658/1100-9233(2007)18[571:TLSITS]2.0.CO;2 | 433             |               |                                                                                             | √                                                                                      |
| CAMPBELL JE, 2008, ENVIRON SCI TECHNOL    | 10.1021/es800052w                             | 418             | √             |                                                                                             |                                                                                        |
| SILVER WL, 2000, RESTOR ECOL              | 10.1046/j.1526-100x.2000.80054.x              | 347             |               | √                                                                                           |                                                                                        |
| GELLRICH M, 2007, AGR ECOSYST ENVIRON     | 10.1016/j.agee.2006.05.001                    | 342             | √             |                                                                                             |                                                                                        |
| GARCIA-RUIZ JM, 2011, AGR ECOSYST ENVIRON | 10.1016/j.agee.2011.01.003                    | 288             | √             |                                                                                             |                                                                                        |
| BAUMANN M, 2011, LAND USE POLICY          | 10.1016/j.landusepol.2010.11.003              | 287             | √             |                                                                                             |                                                                                        |
| QUEIROZ C, 2014, FRONT ECOL ENVIRON       | 10.1890/120348                                | 262             | √             |                                                                                             |                                                                                        |
| RENWICK A, 2013, LAND USE POLICY          | 10.1016/j.landusepol.2012.04.005              | 259             | √             |                                                                                             |                                                                                        |
| ESTEL S, 2015, REMOTE SENS ENVIRON        | 10.1016/j.rse.2015.03.028                     | 252             | √             |                                                                                             |                                                                                        |
| PRISHCHEPOV AV, 2013, LAND USE POLICY     | 10.1016/j.landusepol.2012.06.011              | 251             | √             |                                                                                             |                                                                                        |



| Paper                                          | DOI                                                 | Total Citations | Main research | Appears as a marginal study (appears as a sub study of other studies, or is only mentioned) | The study was not mentioned (the study on abandonment of farmland was not carried out) |
|------------------------------------------------|-----------------------------------------------------|-----------------|---------------|---------------------------------------------------------------------------------------------|----------------------------------------------------------------------------------------|
| POYATOS R, 2003,<br>MT RES DEV                 | 10.1659/0276-<br>4741(2003)023[0362:LUALCC]2.0.CO;2 | 249             |               | √                                                                                           |                                                                                        |
| ZHANG C, 2016,<br>SOIL BIOL<br>BIOCHEM         | 10.1016/j.soilbio.2016.02.013                       | 249             | √             |                                                                                             |                                                                                        |
| KOULOURI M, 2007,<br>CATENA                    | 10.1016/j.catena.2006.07.001                        | 245             | √             |                                                                                             |                                                                                        |
| LASANTA T, 2017,<br>CATENA                     | 10.1016/j.catena.2016.02.024                        | 209             | √             |                                                                                             |                                                                                        |
| LUGO AE, 2004,<br>FOREST ECOL<br>MANAG         | 10.1016/j.foreco.2003.09.012                        | 207             | √             |                                                                                             |                                                                                        |
| KUEMMERLE T,<br>2008, ECOSYSTEMS               | 10.1007/s10021-008-9146-z                           | 206             | √             |                                                                                             |                                                                                        |
| BOWEN ME, 2007,<br>BIOL CONSERV<br>ROMERO-     | 10.1016/j.biocon.2007.08.012                        | 194             |               | √                                                                                           |                                                                                        |
| CALCERRADA R,<br>2004, LANDSCAPE<br>URBAN PLAN | 10.1016/S0169-2046(03)00112-9                       | 189             | √             |                                                                                             |                                                                                        |
| GELLRICH M, 2007,<br>LANDSCAPE<br>URBAN PLAN   | 10.1016/j.landurbplan.2006.03.004                   | 185             | √             |                                                                                             |                                                                                        |
| VAN DER WAL A,<br>2006, SOIL BIOL<br>BIOCHEM   | 10.1016/j.soilbio.2005.04.017                       | 184             | √             |                                                                                             |                                                                                        |
| SUAREZ-SEOANE<br>S, 2002, BIOL<br>CONSERV      | 10.1016/S0006-3207(01)00213-0                       | 167             | √             |                                                                                             |                                                                                        |
| MULLER D, 2013,<br>AGR SYST                    | 10.1016/j.agsy.2012.12.010                          | 162             | √             |                                                                                             |                                                                                        |
| HOOPER E, 2005, J<br>APPL ECOL                 | 10.1111/j.1365-2664.2005.01106.x                    | 159             |               | √                                                                                           |                                                                                        |

| Paper                                        | DOI                                                 | Total Citations | Main research | Appears as<br>a marginal<br>study<br>(appears<br>as a sub<br>study of<br>other<br>studies, or<br>is only<br>mentioned) | The study was not<br>mentioned (the<br>study on<br>abandonment of<br>farmland was not<br>carried out) |
|----------------------------------------------|-----------------------------------------------------|-----------------|---------------|------------------------------------------------------------------------------------------------------------------------|-------------------------------------------------------------------------------------------------------|
|                                              |                                                     |                 |               |                                                                                                                        |                                                                                                       |
| ALCANTARA C,<br>2013, ENVIRON RES<br>LETT    | 10.1088/1748-9326/8/3/035035                        | 153             | √             |                                                                                                                        |                                                                                                       |
| LASANTA T, 2000,<br>CATENA                   | 10.1016/S0341-8162(99)00079-X                       | 152             | √             |                                                                                                                        |                                                                                                       |
| DUNJO G, 2003,<br>CATENA                     | 10.1016/S0341-8162(02)00148-0                       | 150             | √             |                                                                                                                        |                                                                                                       |
| CAMMERAAT LH,<br>1999, CATENA                | 10.1016/S0341-8162(98)00072-1                       | 149             |               | √                                                                                                                      |                                                                                                       |
| BEILIN R, 2014,<br>LAND USE POLICY           | 10.1016/j.landusepol.2013.07.003                    | 149             | √             |                                                                                                                        |                                                                                                       |
| PRISHCHEPOV AV,<br>2012, ENVIRON RES<br>LETT | 10.1088/1748-9326/7/2/024021                        | 148             | √             |                                                                                                                        |                                                                                                       |
| CHAUCHARD S,<br>2007, ECOSYSTEMS             | 10.1007/s10021-007-9065-4                           | 147             |               |                                                                                                                        | √                                                                                                     |
| GOUGH MW, 1990,<br>BIOL CONSERV              | 10.1016/0006-3207(90)90104-W                        | 147             |               |                                                                                                                        | √                                                                                                     |
| HUNZIKER M, 1995,<br>LANDSCAPE<br>URBAN PLAN | 10.1016/0169-2046(95)93251-J                        | 146             | √             |                                                                                                                        |                                                                                                       |
| HEDLUND K, 2003,<br>OIKOS                    | 10.1034/j.1600-0706.2003.12511.x                    | 146             | √             |                                                                                                                        |                                                                                                       |
| TERRES JM, 2015,<br>LAND USE POLICY          | 10.1016/j.landusepol.2015.06.009                    | 142             | √             |                                                                                                                        |                                                                                                       |
| ZHANG Y, 2014,<br>LAND USE POLICY            | 10.1016/j.landusepol.2014.05.011                    | 140             | √             |                                                                                                                        |                                                                                                       |
| SLUITER R, 2007,<br>LANDSCAPE ECOL           | 10.1007/s10980-006-9049-3                           | 136             | √             |                                                                                                                        |                                                                                                       |
| HOOPER E, 2002,<br>ECOL APPL                 | 10.1890/1051-<br>0761(2002)012[1626:RONTST]2.0.CO;2 | 136             |               | √                                                                                                                      |                                                                                                       |
| LI SF, 2017, J<br>GEOGR SCI                  | 10.1007/s11442-017-1426-0                           | 134             | √             |                                                                                                                        |                                                                                                       |

| Paper                                    | DOI                              | Total Citations | Main research | Appears as a marginal study (appears as a sub study of other studies, or is only mentioned) | The study was not mentioned (the study on abandonment of farmland was not carried out) |
|------------------------------------------|----------------------------------|-----------------|---------------|---------------------------------------------------------------------------------------------|----------------------------------------------------------------------------------------|
|                                          |                                  |                 |               |                                                                                             |                                                                                        |
| LESSCHEN JP, 2008, EARTH SURF PROC LAND  | 10.1002/esp.1676                 | 132             | √             |                                                                                             |                                                                                        |
| WANG B, 2011, ENVIRON EARTH SCI          | 10.1007/s12665-010-0577-4        | 130             | √             |                                                                                             |                                                                                        |
| KUEMMERLE T, 2011, GLOBAL CHANGE BIOL    | 10.1111/j.1365-2486.2010.02333.x | 129             | √             |                                                                                             |                                                                                        |
| MOLINILLO M, 1997, ENVIRON MANAGE        | 10.1007/s002679900051            | 123             | √             |                                                                                             |                                                                                        |
| LABRECQUE M, 2003, BIOMASS BIOENERG      | 10.1016/S0961-9534(02)00192-7    | 123             |               |                                                                                             | √                                                                                      |
| LIU Y, 2012, GEOMORPHOLOGY               | 10.1016/j.geomorph.2011.10.009   | 121             | √             |                                                                                             |                                                                                        |
| PLIENINGER T, 2014, PLOS ONE             | 10.1371/journal.pone.0098355     | 121             | √             |                                                                                             |                                                                                        |
| ARNAEZ J, 2011, LAND DEGRAD DEV          | 10.1002/ldr.1032                 | 121             | √             |                                                                                             |                                                                                        |
| SCHIERHORN F, 2013, GLOBAL BIOGEOCHEM CY | 10.1002/2013GB004654             | 120             | √             |                                                                                             |                                                                                        |
| XU DD, 2019, J ENVIRON MANAGE            | 10.1016/j.jenvman.2018.11.136    | 119             | √             |                                                                                             |                                                                                        |
| SIRAMI C, 2008, BIOL CONSERV             | 10.1016/j.biocon.2007.10.015     | 119             | √             |                                                                                             |                                                                                        |
| CERDA A, 1997, ARID SOIL RES REHAB       | 10.1080/15324989709381469        | 116             |               | √                                                                                           |                                                                                        |

| Paper                                     | DOI                               | Total Citations | Main research | Appears as a marginal study (appears as a sub study of other studies, or is only mentioned) | The study was not mentioned (the study on abandonment of farmland was not carried out) |
|-------------------------------------------|-----------------------------------|-----------------|---------------|---------------------------------------------------------------------------------------------|----------------------------------------------------------------------------------------|
|                                           |                                   |                 |               |                                                                                             |                                                                                        |
| DIAZ GI, 2011, LANDSCAPE URBAN PLAN       | 10.1016/j.landurbplan.2010.11.005 | 114             | √             |                                                                                             |                                                                                        |
| MUNROE DK, 2013, CURR OPIN ENV SUST       | 10.1016/j.cosust.2013.06.010      | 110             | √             |                                                                                             |                                                                                        |
| UCHIDA K, 2014, ECOL MONOGR               | 10.1890/13-2170.1                 | 109             | √             |                                                                                             |                                                                                        |
| HOOGWIJK M, 2009, BIOMASS BIOENERG        | 10.1016/j.biombioe.2008.04.005    | 107             |               | √                                                                                           |                                                                                        |
| LESSCHEN JP, 2007, CATENA                 | 10.1016/j.catena.2006.05.014      | 105             | √             |                                                                                             |                                                                                        |
| CHAPMAN CA, 1999, CONSERV BIOL            | 10.1046/j.1523-1739.1999.98229.x  | 104             |               | √                                                                                           |                                                                                        |
| YAN JZ, 2016, LAND USE POLICY             | 10.1016/j.landusepol.2016.06.014  | 102             | √             |                                                                                             |                                                                                        |
| HATNA E, 2011, ECOSYSTEMS                 | 10.1007/s10021-011-9441-y         | 101             |               | √                                                                                           |                                                                                        |
| HOLTKAMP R, 2008, APPL SOIL ECOL          | 10.1016/j.apsoil.2007.11.002      | 101             | √             |                                                                                             |                                                                                        |
| ZELLER V, 2001, SOIL BIOL BIOCHEM         | 10.1016/S0038-0717(00)00208-X     | 101             |               |                                                                                             | √                                                                                      |
| SIRAMI C, 2007, DIVERS DISTRIB            | 10.1111/j.1472-4642.2006.00297.x  | 98              |               | √                                                                                           |                                                                                        |
| PRISHCHEPOV AV, 2012, REMOTE SENS ENVIRON | 10.1016/j.rse.2012.08.017         | 97              | √             |                                                                                             |                                                                                        |

| Paper                                   | DOI                                   | Total Citations | Main research | Appears as a marginal study (appears as a sub study of other studies, or is only mentioned) | The study was not mentioned (the study on abandonment of farmland was not carried out) |
|-----------------------------------------|---------------------------------------|-----------------|---------------|---------------------------------------------------------------------------------------------|----------------------------------------------------------------------------------------|
| DUARTE F, 2008, J ENVIRON MANAGE        | 10.1016/j.jenvman.2007.05.024         | 95              | √             |                                                                                             |                                                                                        |
| MEYFROIDT P, 2016, GLOBAL ENVIRON CHANG | 10.1016/j.gloenvcha.2016.01.003       | 94              | √             |                                                                                             |                                                                                        |
| LEVERS C, 2018, SCI TOTAL ENVIRON       | 10.1016/j.scitotenv.2018.06.326       | 94              | √             |                                                                                             |                                                                                        |
| CHERRY DS, 2001, ENVIRON POLLUT         | 10.1016/S0269-7491(00)00093-2         | 94              |               |                                                                                             | √                                                                                      |
| GIBSON CWD, 1987, BIOL CONSERV          | 10.1016/0006-3207(87)90132-7          | 94              |               | √                                                                                           |                                                                                        |
| YIN H, 2018, REMOTE SENS ENVIRON        | 10.1016/j.rse.2018.02.050             | 93              | √             |                                                                                             |                                                                                        |
| BENJAMIN K, 2005, LANDSCAPE ECOL        | 10.1007/s10980-005-0068-2             | 91              | √             |                                                                                             |                                                                                        |
| PREVOSTO B, 2011, FOLIA GEOBOT          | 10.1007/s12224-010-9096-z             | 91              |               | √                                                                                           |                                                                                        |
| ZHANG KR, 2010, FOREST ECOL MANAG       | 10.1016/j.foreco.2010.02.014          | 91              | √             |                                                                                             |                                                                                        |
| BENAYAS JMR, 2005, FOREST ECOL MANAG    | 10.1016/j.foreco.2005.03.032          | 90              | √             |                                                                                             |                                                                                        |
| ROMERO-DIAZ A, 2017, CATENA             | 10.1016/j.catena.2016.08.013          | 87              | √             |                                                                                             |                                                                                        |
| ZHANG JT, 2005, J ARID ENVIRON          | 10.1016/j.jaridenv.2005.03.027        | 87              | √             |                                                                                             |                                                                                        |
| PICHTTEL JR, 1994, J ENVIRON QUAL       | 10.2134/jeq1994.00472425002300040022x | 86              |               |                                                                                             | √                                                                                      |

| Paper                                 | DOI                              | Total Citations | Main research | Appears as a marginal study (appears as a sub study of other studies, or is only mentioned) | The study was not mentioned (the study on abandonment of farmland was not carried out) |
|---------------------------------------|----------------------------------|-----------------|---------------|---------------------------------------------------------------------------------------------|----------------------------------------------------------------------------------------|
| SANCHEZ-CUERVO                        |                                  |                 |               |                                                                                             |                                                                                        |
| AM, 2013, ECOSYSTEMS                  | 10.1007/s10021-013-9667-y        | 86              | √             |                                                                                             |                                                                                        |
| SPERA SA, 2014, ENVIRON RES LETT      | 10.1088/1748-9326/9/6/064010     | 85              |               |                                                                                             | √                                                                                      |
| PAZUR R, 2014, APPL GEOGR             | 10.1016/j.apgeog.2014.07.014     | 83              | √             |                                                                                             |                                                                                        |
| JOHANSSON T, 1999, BIOMASS BIOENERG-a | 10.1016/S0961-9534(98)00075-0    | 82              | √             |                                                                                             |                                                                                        |
| WANG B, 2013, EARTH SURF PROC LAND    | 10.1002/esp.3459                 | 81              | √             |                                                                                             |                                                                                        |
| LESSCHEN JP, 2008, J ARID ENVIRON     | 10.1016/j.jaridenv.2008.06.006   | 81              | √             |                                                                                             |                                                                                        |
| GARCIA-RUIZ JM, 2005, CATENA          | 10.1016/j.catena.2004.05.006     | 80              |               | √                                                                                           |                                                                                        |
| CERDA A, 2018, PROG PHYS GEOG         | 10.1177/0309133318758521         | 80              | √             |                                                                                             |                                                                                        |
| COLON SM, 2006, BIOTROPICA            | 10.1111/j.1744-7429.2006.00159.x | 79              |               | √                                                                                           |                                                                                        |
| HOOVER ER, 2004, ECOLOGY              | 10.1890/03-0655                  | 79              |               |                                                                                             | √                                                                                      |
| KAUFFMAN JB, 2009, ECOL APPL          | 10.1890/08-1696.1                | 79              |               | √                                                                                           |                                                                                        |
| HARMER R, 2001, BIOL CONSERV          | 10.1016/S0006-3207(01)00072-6    | 79              | √             |                                                                                             |                                                                                        |
| XIE HL, 2014, SUSTAINABILITY-BASEL    | 10.3390/su6031260                | 79              | √             |                                                                                             |                                                                                        |

| Paper                                              | DOI                              | Total Citations | Main research | Appears as a marginal study (appears as a sub study of other studies, or is only mentioned) | The study was not mentioned (the study on abandonment of farmland was not carried out) |
|----------------------------------------------------|----------------------------------|-----------------|---------------|---------------------------------------------------------------------------------------------|----------------------------------------------------------------------------------------|
|                                                    |                                  |                 |               |                                                                                             |                                                                                        |
| NOVARA A, 2016,<br>SCI TOTAL<br>ENVIRON            | 10.1016/j.scitotenv.2016.01.095  | 79              | √             |                                                                                             |                                                                                        |
| NOVARA A, 2017,<br>SCI TOTAL<br>ENVIRON            | 10.1016/j.scitotenv.2016.10.123  | 78              | √             |                                                                                             |                                                                                        |
| NADAL-ROMERO<br>E, 2016, AGR<br>ECOSYST<br>ENVIRON | 10.1016/j.agee.2016.05.003       | 77              | √             |                                                                                             |                                                                                        |
| CORBELLE-RICO E,<br>2012, LAND USE<br>POLICY       | 10.1016/j.landusepol.2011.08.008 | 77              | √             |                                                                                             |                                                                                        |
| HARDEN CP, 1996,<br>MT RES DEV                     | 10.2307/3673950                  | 76              | √             |                                                                                             |                                                                                        |
| GISPERT M, 2013,<br>GEODERMA                       | 10.1016/j.geoderma.2013.03.012   | 76              |               | √                                                                                           |                                                                                        |
| PRICE B, 2015,<br>APPL GEOGR                       | 10.1016/j.apgeog.2014.12.009     | 75              |               | √                                                                                           |                                                                                        |
| SIKOR T, 2009,<br>WORLD DEV                        | 10.1016/j.worlddev.2008.08.013   | 74              | √             |                                                                                             |                                                                                        |
| VASSILEV K, 2011,<br>PLANT BIOSYST                 | 10.1080/11263504.2011.601337     | 74              | √             |                                                                                             |                                                                                        |
| SHANG ZH, 2008,<br>LAND DEGRAD<br>DEV              | 10.1002/ldr.861                  | 74              |               | √                                                                                           |                                                                                        |
